# Supplementary material for: Genetic Algorithm-assisted optimization of partially dyed-TiO2for room-temperature printable photoanodes of dye-sensitized solar cells
Source: Royal Society of Chemistry journal article supplement (doi:10.1039/c1jm14416b), 2011-11-03
Supplement: c1jm14416b.pdf [file c1jm14416b.pdf]

## Supporting Information

### ***Genetic Algorithm-Assisted Optimization of Partially dyed-TiO<sub>2</sub> for Low-Temperature Processable Photoanodes of DSSC***

Eun Gyoung Bae, Hyunho Kim, Yun-Hwa Hwang, Kee-Sun Sohn\* and Myounggho Pyo\*

Department of Printed Electronics and Engineering in World Class University (WCU) Program, Suncheon National University,  
Suncheon, Chonnam 540-742, Republic of Korea

E-mail: kssohn@suncheon.ac.kr (K.-S. Sohn); mho@suncheon.ac.kr (M. Pyo)

#### *Content:*

Preparation of partially dyed-TiO<sub>2</sub> (S2)

Visible spectra of N3 desorbed from partially dyed-TiO<sub>2</sub> (S3)

Preparation of photoanodes (S4)

Cell fabrication (S4)

Decision parameters (S5)

Decision parameters and cell efficiencies for 1<sup>st</sup> – 7<sup>th</sup> generation (S7)

## Preparation of partially dyed-TiO<sub>2</sub>

Different sizes of TiO<sub>2</sub> nanoparticles were dispersed in ethanol solutions containing various concentrations of N3. The TiO<sub>2</sub> nanoparticles of the average diameters of 7 nm (MKN-TiO<sub>2</sub>-C07, MK nano), 14 nm (P90, Degussa), 21 nm (P25, Degussa), and 40 nm (#22N-0801A, Inframat Advanced Materials LLC) were purchased and used as received. The average particle sizes of TiO<sub>2</sub>, determined by the Scherrer's equation from X-ray diffraction or the FESEM images, were in a good agreement with the values reported by suppliers. To control the amounts of N3 adsorbed on TiO<sub>2</sub>, TiO<sub>2</sub> powers (0.1 g) were dispersed in N3 solutions (1 mL) of various concentrations (3, 7, 12, 17 mM). After shaking overnight, the solution was repeatedly washed with ethanol by centrifugation until obtaining a colorless supernatant.

The amounts of dye-loading were spectroscopically determined. Partially dyed-TiO<sub>2</sub> (10 mg) was redispersed in NaOH aq. solutions and the concentration of N3 after complete desorption was determined from absorption maxima, using  $\epsilon = 1.23 \times 10^4 \text{ M}^{-1} \text{ cm}^{-1}$  at 500 nm. Fig. S1 demonstrates the difference of Visible spectra, depending on the N3 concentration during dye adsorption on TiO<sub>2</sub>. In general, the absorption maximum increases with the increase of N3 concentration, but the increasing rate becomes less at high N3 concentrations indicative of closeness to a complete coverage with N3. The dye-loading is also affected by the TiO<sub>2</sub> size due to surface area difference. The surface coverage of N3 was explained in the text.

### Visible spectra of N3 desorbed from partially dyed-TiO<sub>2</sub>

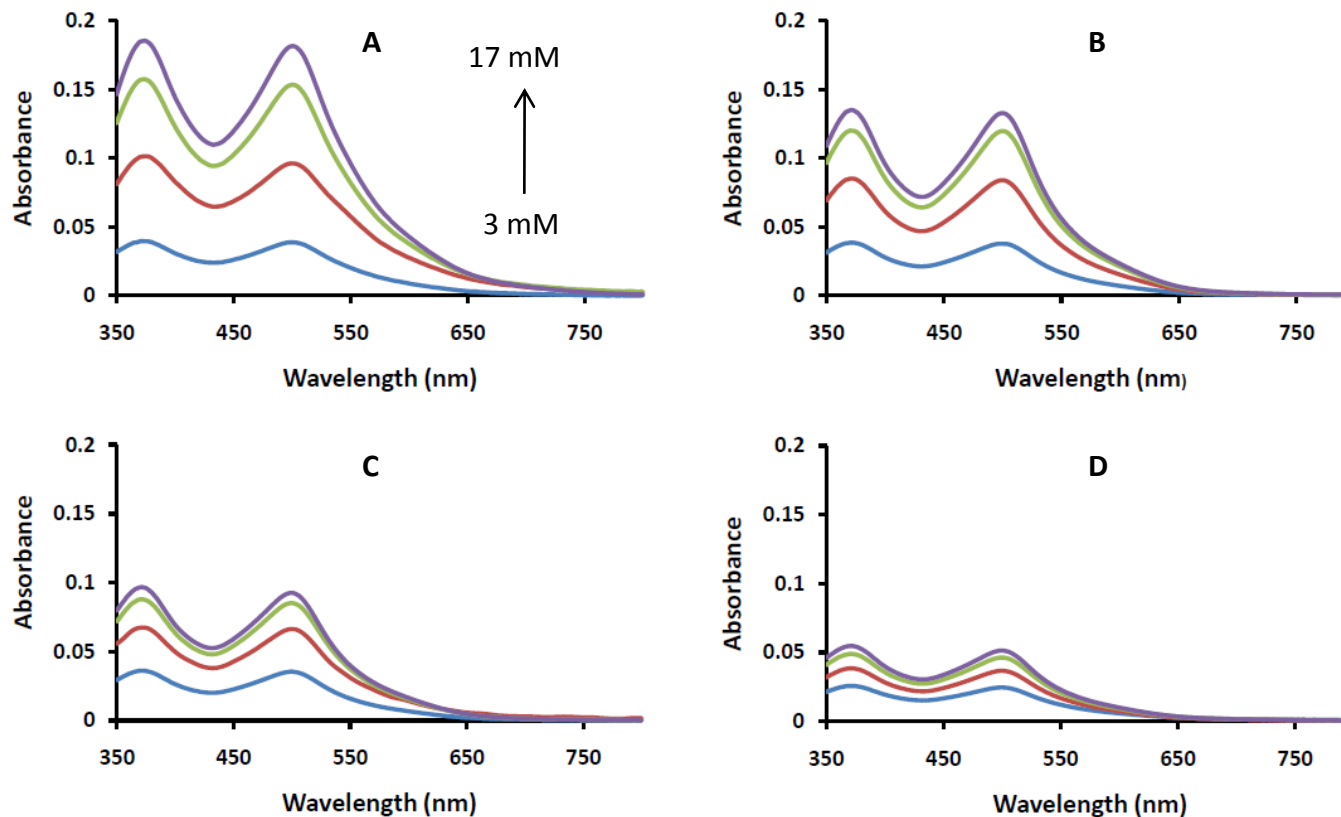

**Figure S1.** Visible spectra of NaOH aq. solution containing N3 desorbed from partially-dyed TiO<sub>2</sub>. Partially dyed-TiO<sub>2</sub> prepared from TiO<sub>2</sub> of diameters of (A) 7, (B) 14, (C) 21, and (D) 40 nm and dyed in 3, 7, 12, and 17 mM N3 solutions.

## Preparation of photoanodes

According to the GA-selected decision parameters, partially dyed-TiO<sub>2</sub> nanoparticles with various sizes and dye-loadings were mixed in ethanol and shaken for 12 hours. 30 kinds of solutions with the different compositions and solid contents were prepared per each generation. Immediately after brief shaking of the solution, the photoanodes were produced on cleaned and TiCl<sub>4</sub>-treated FTO glasses by a doctor blade method. The TiCl<sub>4</sub> treatment was performed by dipping FTO in a titanium(IV) solution at 70 °C for 30 min. The film thickness was adjusted by the solid content of the solution and the tape thickness. After evaporating the solvent at RT, the tape was removed and the partially dyed-TiO<sub>2</sub> film was subjected to the compression (3635 x-Press, SPEX SamplePrep LLC). The pressure was controlled at 28, 50, 72, and 94 MPa.

## Cell fabrication

The counter electrode was prepared by applying 2 drops of 5 mM H<sub>2</sub>PtCl<sub>6</sub> on FTO and sintering at 400 °C for 15 min. The Pt counter and photoanode were assembled face-to-face, using hot melting foil (Solaronix SX1170-60)) sandwiched between two electrodes. The space between the electrodes was filled with an electrolyte solution through two holes. The two holes were then completely sealed using Surlyn film and cover glass. The electrolyte solution contained 0.2 M lithium iodide, 0.05 M iodine, 0.5 M t-butylpyridine, and 0.7 M 1,2-dimethyl-3-propylimidazolium iodide in acetonitrile. The mask of a slightly larger hole (0.283 cm<sup>2</sup>) than the active area of N3/TiO<sub>2</sub> (0.196 cm<sup>2</sup>) was affixed to the photoanode side.

## Decision parameters

### Preparation of partially dyed-TiO<sub>2</sub> (PDT)

TiO<sub>2</sub> size: (T1) 7nm; (T2) 14 nm; (T3) 21 nm; (T4) 40 nm

N3 concentration: (D1) 3 mM; (D2) 7 mM; (D3) 12 mM; (D4) 17 mM

When assumed the use of all 4 TiO<sub>2</sub> (However, this does not necessarily mean that all 4 TiO<sub>2</sub> were incorporated into photoanodes. See composition of PDT below.), the total number of cases for the selection PDT becomes 4 x 4 x 4 x 4 = 2<sup>8</sup> (Note that there are 4 different N3 solutions for each TiO<sub>2</sub>).

### Preparation of photoanodes with PDT

Composition (wt%) of PDT

|      | PDT                  |     |     |    |
|------|----------------------|-----|-----|----|
|      | T1                   | T2  | T3  | T4 |
| W1   | 0                    | 0   | 100 | 0  |
| .    | <i>see next page</i> |     |     |    |
| .    |                      |     |     |    |
| .    |                      |     |     |    |
| .    |                      |     |     |    |
| W128 | 0                    | 100 | 0   | 0  |

X

Control of film thickness

|    | PDT dispersed in 1 mL ethanol | tape thickness |
|----|-------------------------------|----------------|
| F1 | 0.10 g                        | 1              |
| F2 | 0.10 g                        | 2              |
| F3 | 0.15 g                        | 1              |
| F4 | 0.15 g                        | 2              |
| F5 | 0.20 g                        | 1              |
| F6 | 0.20 g                        | 2              |
| F7 | 0.30 g                        | 1              |
| F8 | 0.30 g                        | 2              |

X

Pressure applied

|    |       |
|----|-------|
| P1 | 28MPa |
| P2 | 50MPa |
| P3 | 72MPa |
| P4 | 94MPa |

Total Number of cases = 2<sup>8</sup> x 2<sup>7</sup> x 2<sup>3</sup> x 2<sup>2</sup> = 2<sup>20</sup>

Composition (wt%) of PDT

|     | T1 | T2 | T3  | T4 |     | T1 | T2 | T3 | T4 |     | T1 | T2 | T3 | T4 |      | T1 | T2  | T3 | T4 |
|-----|----|----|-----|----|-----|----|----|----|----|-----|----|----|----|----|------|----|-----|----|----|
| W1  | 0  | 0  | 100 | 0  | W33 | 10 | 10 | 60 | 20 | W65 | 0  | 70 | 30 | 0  | W97  | 0  | 90  | 10 | 0  |
| W2  | 10 | 0  | 90  | 0  | W34 | 0  | 50 | 50 | 0  | W66 | 10 | 60 | 30 | 0  | W98  | 10 | 80  | 10 | 0  |
| W3  | 0  | 10 | 90  | 0  | W35 | 10 | 40 | 50 | 0  | W67 | 0  | 60 | 30 | 10 | W99  | 0  | 80  | 10 | 10 |
| W4  | 0  | 0  | 90  | 10 | W36 | 0  | 40 | 50 | 10 | W68 | 20 | 50 | 30 | 0  | W100 | 20 | 70  | 10 | 0  |
| W5  | 20 | 0  | 80  | 0  | W37 | 30 | 20 | 50 | 0  | W69 | 0  | 50 | 30 | 20 | W101 | 0  | 70  | 10 | 20 |
| W6  | 0  | 20 | 80  | 0  | W38 | 30 | 0  | 50 | 20 | W70 | 10 | 50 | 30 | 10 | W102 | 10 | 70  | 10 | 10 |
| W7  | 0  | 0  | 80  | 20 | W39 | 20 | 30 | 50 | 0  | W71 | 30 | 40 | 30 | 0  | W103 | 30 | 60  | 10 | 0  |
| W8  | 10 | 10 | 80  | 0  | W40 | 0  | 30 | 50 | 20 | W72 | 0  | 40 | 30 | 30 | W104 | 0  | 60  | 10 | 30 |
| W9  | 10 | 0  | 80  | 10 | W41 | 20 | 0  | 50 | 30 | W73 | 20 | 40 | 30 | 10 | W105 | 20 | 60  | 10 | 10 |
| W10 | 0  | 10 | 80  | 10 | W42 | 0  | 20 | 50 | 30 | W74 | 10 | 40 | 30 | 20 | W106 | 10 | 60  | 10 | 20 |
| W11 | 30 | 0  | 70  | 0  | W43 | 30 | 10 | 50 | 10 | W75 | 30 | 30 | 30 | 10 | W107 | 30 | 50  | 10 | 10 |
| W12 | 0  | 30 | 70  | 0  | W44 | 10 | 30 | 50 | 10 | W76 | 30 | 10 | 30 | 30 | W108 | 10 | 50  | 10 | 30 |
| W13 | 0  | 0  | 70  | 30 | W45 | 10 | 10 | 50 | 30 | W77 | 10 | 30 | 30 | 30 | W109 | 20 | 50  | 10 | 20 |
| W14 | 20 | 10 | 70  | 0  | W46 | 20 | 20 | 50 | 10 | W78 | 20 | 30 | 30 | 20 | W110 | 30 | 40  | 10 | 20 |
| W15 | 20 | 0  | 70  | 10 | W47 | 10 | 20 | 50 | 20 | W79 | 30 | 20 | 30 | 20 | W111 | 20 | 40  | 10 | 30 |
| W16 | 10 | 20 | 70  | 0  | W48 | 20 | 10 | 50 | 20 | W80 | 20 | 20 | 30 | 30 | W112 | 30 | 30  | 10 | 30 |
| W17 | 10 | 0  | 70  | 20 | W49 | 0  | 60 | 40 | 0  | W81 | 0  | 80 | 20 | 0  | W113 | 30 | 40  | 0  | 30 |
| W18 | 0  | 20 | 70  | 10 | W50 | 10 | 50 | 40 | 0  | W82 | 10 | 70 | 20 | 0  | W114 | 20 | 50  | 0  | 30 |
| W19 | 0  | 10 | 70  | 20 | W51 | 0  | 50 | 40 | 10 | W83 | 0  | 70 | 20 | 10 | W115 | 30 | 50  | 0  | 20 |
| W20 | 10 | 10 | 70  | 10 | W52 | 20 | 40 | 40 | 0  | W84 | 20 | 60 | 20 | 0  | W116 | 20 | 60  | 0  | 20 |
| W21 | 0  | 40 | 60  | 0  | W53 | 0  | 40 | 40 | 20 | W85 | 0  | 60 | 20 | 20 | W117 | 10 | 60  | 0  | 30 |
| W22 | 30 | 10 | 60  | 0  | W54 | 10 | 40 | 40 | 10 | W86 | 10 | 60 | 20 | 10 | W118 | 30 | 60  | 0  | 10 |
| W23 | 30 | 0  | 60  | 10 | W55 | 30 | 30 | 40 | 0  | W87 | 30 | 50 | 20 | 0  | W118 | 10 | 70  | 0  | 20 |
| W24 | 10 | 30 | 60  | 0  | W56 | 0  | 30 | 40 | 30 | W88 | 0  | 50 | 20 | 30 | W120 | 20 | 70  | 0  | 10 |
| W25 | 0  | 30 | 60  | 10 | W57 | 30 | 0  | 40 | 30 | W89 | 20 | 50 | 20 | 10 | W121 | 0  | 70  | 0  | 30 |
| W26 | 10 | 0  | 60  | 30 | W58 | 30 | 20 | 40 | 10 | W90 | 10 | 50 | 20 | 20 | W122 | 30 | 70  | 0  | 0  |
| W27 | 0  | 10 | 60  | 30 | W59 | 30 | 10 | 40 | 20 | W91 | 30 | 40 | 20 | 10 | W123 | 10 | 80  | 0  | 10 |
| W28 | 20 | 20 | 60  | 0  | W60 | 20 | 30 | 40 | 10 | W92 | 10 | 40 | 20 | 30 | W124 | 0  | 80  | 0  | 20 |
| W29 | 20 | 0  | 60  | 20 | W61 | 10 | 30 | 40 | 20 | W93 | 20 | 40 | 20 | 20 | W125 | 20 | 80  | 0  | 0  |
| W30 | 0  | 20 | 60  | 20 | W62 | 10 | 20 | 40 | 30 | W94 | 30 | 20 | 20 | 30 | W126 | 0  | 90  | 0  | 10 |
| W31 | 20 | 10 | 60  | 10 | W63 | 20 | 10 | 40 | 30 | W95 | 20 | 30 | 20 | 30 | W127 | 10 | 90  | 0  | 0  |
| W32 | 10 | 20 | 60  | 10 | W64 | 20 | 20 | 40 | 20 | W96 | 30 | 30 | 20 | 20 | W128 | 0  | 100 | 0  | 0  |

T1 & T4 contents = 0 ~ 30 wt%, T2 & T3 contents = 0 ~ 100 wt%

### 1<sup>st</sup> Generation : Decision parameters and cell efficiencies

|       | Composition of TiO <sub>2</sub> (wt%) |    |    |    | Relative amount of dyes on TiO <sub>2</sub> |    |    |    | Relative film thickness | Pressure applied (Mpa) | η(%)        |
|-------|---------------------------------------|----|----|----|---------------------------------------------|----|----|----|-------------------------|------------------------|-------------|
|       | T1                                    | T2 | T3 | T4 | T1                                          | T2 | T3 | T4 |                         |                        |             |
| 1G-1  | 30                                    | 40 | 20 | 10 | D4                                          | D2 | D4 | D3 | F7                      | 28                     | 3.59 ± 0.32 |
| 1G-2  | 0                                     | 0  | 90 | 10 | D2                                          | D3 | D4 | D4 | F4                      | 72                     | 4.93 ± 0.13 |
| 1G-3  | 20                                    | 20 | 50 | 10 | D3                                          | D2 | D1 | D4 | F1                      | 94                     | 3.22 ± 0.03 |
| 1G-4  | 0                                     | 10 | 80 | 10 | D2                                          | D1 | D1 | D1 | F3                      | 50                     | 3.42 ± 0.08 |
| 1G-5  | 0                                     | 0  | 70 | 30 | D2                                          | D3 | D4 | D3 | F3                      | 28                     | 3.36 ± 0.16 |
| 1G-6  | 30                                    | 10 | 40 | 20 | D3                                          | D4 | D3 | D2 | F8                      | 94                     | 4.42 ± 0.08 |
| 1G-7  | 30                                    | 10 | 30 | 30 | D2                                          | D2 | D3 | D2 | F3                      | 94                     | 3.92 ± 0.16 |
| 1G-8  | 20                                    | 40 | 20 | 20 | D2                                          | D3 | D1 | D4 | F7                      | 50                     | 4.48 ± 0.11 |
| 1G-9  | 10                                    | 40 | 20 | 30 | D1                                          | D4 | D2 | D4 | F8                      | 50                     | 4.13 ± 0.11 |
| 1G-10 | 0                                     | 30 | 60 | 10 | D2                                          | D1 | D4 | D4 | F2                      | 72                     | 4.20 ± 0.13 |
| 1G-11 | 20                                    | 40 | 10 | 30 | D2                                          | D3 | D4 | D2 | F2                      | 50                     | 3.28 ± 0.09 |
| 1G-12 | 30                                    | 30 | 20 | 20 | D3                                          | D3 | D1 | D3 | F6                      | 72                     | 4.07 ± 0.12 |
| 1G-13 | 20                                    | 60 | 20 | 0  | D3                                          | D2 | D2 | D3 | F6                      | 94                     | 4.02 ± 0.15 |
| 1G-14 | 10                                    | 20 | 60 | 10 | D1                                          | D4 | D3 | D1 | F6                      | 50                     | 4.70 ± 0.19 |
| 1G-15 | 30                                    | 10 | 40 | 20 | D3                                          | D1 | D4 | D3 | F1                      | 28                     | 2.52 ± 0.19 |
| 1G-16 | 20                                    | 40 | 10 | 30 | D3                                          | D4 | D4 | D2 | F2                      | 50                     | 2.84 ± 0.19 |
| 1G-17 | 30                                    | 50 | 0  | 20 | D1                                          | D1 | D1 | D1 | F7                      | 72                     | 1.63 ± 0.08 |
| 1G-18 | 10                                    | 30 | 50 | 10 | D1                                          | D3 | D3 | D3 | F4                      | 50                     | 4.36 ± 0.10 |
| 1G-19 | 20                                    | 20 | 50 | 10 | D2                                          | D1 | D1 | D2 | F3                      | 28                     | 2.72 ± 0.08 |
| 1G-20 | 0                                     | 70 | 0  | 30 | D4                                          | D1 | D4 | D3 | F1                      | 72                     | 1.86 ± 0.07 |
| 1G-21 | 30                                    | 20 | 40 | 10 | D2                                          | D4 | D2 | D3 | F1                      | 94                     | 2.92 ± 0.02 |
| 1G-22 | 0                                     | 90 | 10 | 0  | D3                                          | D4 | D2 | D1 | F4                      | 72                     | 4.29 ± 0.10 |
| 1G-23 | 0                                     | 30 | 50 | 20 | D1                                          | D1 | D1 | D4 | F6                      | 28                     | 3.70 ± 0.13 |
| 1G-24 | 10                                    | 50 | 40 | 0  | D3                                          | D4 | D3 | D4 | F6                      | 50                     | 4.50 ± 0.12 |
| 1G-25 | 10                                    | 10 | 60 | 20 | D3                                          | D4 | D2 | D1 | F3                      | 50                     | 4.03 ± 0.08 |
| 1G-26 | 20                                    | 20 | 40 | 20 | D2                                          | D1 | D3 | D4 | F5                      | 94                     | 4.31 ± 0.07 |
| 1G-27 | 0                                     | 40 | 30 | 30 | D2                                          | D3 | D1 | D3 | F5                      | 94                     | 4.94 ± 0.03 |
| 1G-28 | 0                                     | 40 | 40 | 20 | D4                                          | D4 | D3 | D4 | F5                      | 50                     | 4.77 ± 0.12 |
| 1G-29 | 30                                    | 20 | 40 | 10 | D4                                          | D1 | D4 | D3 | F2                      | 94                     | 4.25 ± 0.11 |
| 1G-30 | 0                                     | 40 | 50 | 10 | D1                                          | D4 | D1 | D4 | F1                      | 94                     | 3.28 ± 0.14 |

(red color) the highest η used for the next generation (Elicitism)

### 1<sup>st</sup> Generation : Cell parameters for 4 independent samples (1G-1 ~ 1G-10)

| 1G-1                            | 1      | 2      | 3      | 4      | average          |
|---------------------------------|--------|--------|--------|--------|------------------|
| $\eta(\%)$                      | 4.02   | 3.52   | 3.25   | 3.58   | $3.59 \pm 0.32$  |
| $J_{sc}(\text{mA}/\text{cm}^2)$ | 7.89   | 6.50   | 6.39   | 6.76   | $6.89 \pm 0.69$  |
| $V_{oc}(\text{mV})$             | 671.85 | 696.63 | 671.85 | 694.24 | $683.6 \pm 13.7$ |
| FF(%)                           | 75.79  | 77.83  | 75.61  | 76.31  | $76.4 \pm 1.0$   |

| 1G-2                            | 1      | 2      | 3      | 4      | average          |
|---------------------------------|--------|--------|--------|--------|------------------|
| $\eta(\%)$                      | 4.98   | 4.95   | 4.74   | 5.03   | $4.93 \pm 0.13$  |
| $J_{sc}(\text{mA}/\text{cm}^2)$ | 10.75  | 10.59  | 10.31  | 11.06  | $10.68 \pm 0.31$ |
| $V_{oc}(\text{mV})$             | 642.26 | 649.46 | 641.47 | 642.26 | $643.9 \pm 3.8$  |
| FF(%)                           | 72.22  | 71.91  | 71.69  | 70.86  | $71.7 \pm 0.6$   |

| 1G-3                            | 1      | 2      | 3      | 4      | average         |
|---------------------------------|--------|--------|--------|--------|-----------------|
| $\eta(\%)$                      | 3.26   | 3.22   | 3.21   | 3.18   | $3.22 \pm 0.03$ |
| $J_{sc}(\text{mA}/\text{cm}^2)$ | 5.85   | 5.82   | 5.75   | 5.68   | $5.78 \pm 0.08$ |
| $V_{oc}(\text{mV})$             | 726.21 | 725.42 | 727.81 | 725.42 | $726.2 \pm 1.1$ |
| FF(%)                           | 76.79  | 76.31  | 76.82  | 77.25  | $76.8 \pm 0.4$  |

| 1G-4                            | 1      | 2      | 3      | 4      | average          |
|---------------------------------|--------|--------|--------|--------|------------------|
| $\eta(\%)$                      | 3.44   | 3.51   | 3.42   | 3.32   | $3.42 \pm 0.08$  |
| $J_{sc}(\text{mA}/\text{cm}^2)$ | 6.17   | 6.47   | 6.30   | 6.01   | $6.24 \pm 0.20$  |
| $V_{oc}(\text{mV})$             | 734.22 | 715.02 | 715.02 | 731.01 | $723.8 \pm 10.2$ |
| FF(%)                           | 75.85  | 75.94  | 75.99  | 75.70  | $75.9 \pm 0.1$   |

| 1G-5                            | 1      | 2      | 3      | 4      | average         |
|---------------------------------|--------|--------|--------|--------|-----------------|
| $\eta(\%)$                      | 3.58   | 3.20   | 3.34   | 3.33   | $3.36 \pm 0.16$ |
| $J_{sc}(\text{mA}/\text{cm}^2)$ | 6.30   | 5.58   | 5.84   | 5.79   | $5.88 \pm 0.30$ |
| $V_{oc}(\text{mV})$             | 735.81 | 739.01 | 739.80 | 739.80 | $738.6 \pm 1.9$ |
| FF(%)                           | 77.19  | 77.60  | 77.44  | 77.73  | $77.5 \pm 0.2$  |

| 1G-6                            | 1      | 2      | 3      | 4      | average         |
|---------------------------------|--------|--------|--------|--------|-----------------|
| $\eta(\%)$                      | 4.36   | 4.52   | 4.34   | 4.44   | $4.42 \pm 0.08$ |
| $J_{sc}(\text{mA}/\text{cm}^2)$ | 8.88   | 9.32   | 8.88   | 9.44   | $9.13 \pm 0.29$ |
| $V_{oc}(\text{mV})$             | 663.05 | 668.65 | 664.65 | 651.06 | $661.9 \pm 7.6$ |
| FF(%)                           | 74.01  | 72.58  | 73.63  | 72.23  | $73.1 \pm 0.8$  |

| 1G-7                            | 1      | 2      | 3      | 4      | average         |
|---------------------------------|--------|--------|--------|--------|-----------------|
| $\eta(\%)$                      | 4.01   | 3.77   | 3.80   | 4.10   | $3.92 \pm 0.16$ |
| $J_{sc}(\text{mA}/\text{cm}^2)$ | 7.67   | 7.03   | 7.35   | 8.15   | $7.55 \pm 0.48$ |
| $V_{oc}(\text{mV})$             | 690.23 | 694.24 | 683.04 | 678.24 | $686.4 \pm 7.2$ |
| FF(%)                           | 75.82  | 77.22  | 75.75  | 74.24  | $75.8 \pm 1.2$  |

| 1G-8                            | 1      | 2      | 3      | 4      | average          |
|---------------------------------|--------|--------|--------|--------|------------------|
| $\eta(\%)$                      | 4.42   | 4.53   | 4.36   | 4.61   | $4.48 \pm 0.11$  |
| $J_{sc}(\text{mA}/\text{cm}^2)$ | 8.69   | 8.82   | 9.00   | 9.33   | $8.96 \pm 0.28$  |
| $V_{oc}(\text{mV})$             | 677.45 | 678.24 | 653.46 | 663.86 | $668.3 \pm 11.9$ |
| FF(%)                           | 75.09  | 75.64  | 74.12  | 74.42  | $74.8 \pm 0.7$   |

| 1G-9                            | 1      | 2      | 3      | 4      | average         |
|---------------------------------|--------|--------|--------|--------|-----------------|
| $\eta(\%)$                      | 4.07   | 4.05   | 4.29   | 4.12   | $4.13 \pm 0.11$ |
| $J_{sc}(\text{mA}/\text{cm}^2)$ | 8.32   | 8.45   | 8.62   | 8.60   | $8.50 \pm 0.14$ |
| $V_{oc}(\text{mV})$             | 659.85 | 659.85 | 663.05 | 647.86 | $657.7 \pm 6.7$ |
| FF(%)                           | 74.06  | 72.68  | 74.97  | 74.00  | $73.9 \pm 0.9$  |

| 1G-10                           | 1      | 2      | 3      | 4      | average         |
|---------------------------------|--------|--------|--------|--------|-----------------|
| $\eta(\%)$                      | 4.35   | 4.26   | 4.08   | 4.09   | $4.20 \pm 0.13$ |
| $J_{sc}(\text{mA}/\text{cm}^2)$ | 8.18   | 7.91   | 7.50   | 7.77   | $7.84 \pm 0.28$ |
| $V_{oc}(\text{mV})$             | 711.83 | 711.02 | 711.83 | 705.42 | $710.0 \pm 3.1$ |
| FF(%)                           | 74.78  | 75.83  | 76.36  | 74.64  | $75.4 \pm 0.8$  |



### 1<sup>st</sup> Generation : Cell parameters for 4 independent samples (1G-11 ~ 1G-20)

| 1G-11                           | 1      | 2      | 3      | 4      | average          |
|---------------------------------|--------|--------|--------|--------|------------------|
| $\eta(\%)$                      | 3.20   | 3.21   | 3.30   | 3.40   | $3.28 \pm 0.09$  |
| $J_{sc}(\text{mA}/\text{cm}^2)$ | 6.06   | 6.32   | 5.87   | 6.45   | $6.18 \pm 0.26$  |
| $V_{oc}(\text{mV})$             | 695.83 | 699.84 | 721.42 | 699.84 | $704.2 \pm 11.6$ |
| FF(%)                           | 75.97  | 72.53  | 77.85  | 75.26  | $75.4 \pm 2.2$   |

| 1G-12                           | 1      | 2      | 3      | 4      | average          |
|---------------------------------|--------|--------|--------|--------|------------------|
| $\eta(\%)$                      | 3.94   | 4.05   | 4.23   | 4.04   | $4.07 \pm 0.12$  |
| $J_{sc}(\text{mA}/\text{cm}^2)$ | 7.71   | 7.86   | 7.87   | 7.76   | $7.80 \pm 0.08$  |
| $V_{oc}(\text{mV})$             | 694.24 | 677.45 | 702.23 | 677.45 | $687.8 \pm 12.4$ |
| FF(%)                           | 73.69  | 76.01  | 76.52  | 76.79  | $75.8 \pm 1.4$   |

| 1G-13                           | 1      | 2      | 3      | 4      | average         |
|---------------------------------|--------|--------|--------|--------|-----------------|
| $\eta(\%)$                      | 3.81   | 4.11   | 4.02   | 4.15   | $4.02 \pm 0.15$ |
| $J_{sc}(\text{mA}/\text{cm}^2)$ | 7.63   | 8.35   | 8.39   | 8.40   | $8.19 \pm 0.38$ |
| $V_{oc}(\text{mV})$             | 660.65 | 660.65 | 651.06 | 663.05 | $658.9 \pm 5.3$ |
| FF(%)                           | 75.64  | 74.57  | 73.70  | 74.57  | $74.6 \pm 0.8$  |

| 1G-14                           | 1      | 2      | 3      | 4      | average          |
|---------------------------------|--------|--------|--------|--------|------------------|
| $\eta(\%)$                      | 4.87   | 4.85   | 4.52   | 4.56   | $4.70 \pm 0.19$  |
| $J_{sc}(\text{mA}/\text{cm}^2)$ | 9.70   | 9.44   | 8.74   | 8.24   | $9.03 \pm 0.66$  |
| $V_{oc}(\text{mV})$             | 675.04 | 684.63 | 685.44 | 718.22 | $690.8 \pm 18.9$ |
| FF(%)                           | 74.45  | 75.00  | 75.37  | 77.02  | $75.5 \pm 1.1$   |

| 1G-15                           | 1      | 2      | 3      | 4      | average         |
|---------------------------------|--------|--------|--------|--------|-----------------|
| $\eta(\%)$                      | 2.79   | 2.49   | 2.45   | 2.36   | $2.52 \pm 0.19$ |
| $J_{sc}(\text{mA}/\text{cm}^2)$ | 4.87   | 4.43   | 4.38   | 4.10   | $4.45 \pm 0.32$ |
| $V_{oc}(\text{mV})$             | 724.61 | 723.82 | 725.42 | 733.41 | $726.8 \pm 4.4$ |
| FF(%)                           | 79.02  | 77.72  | 76.98  | 78.38  | $78.0 \pm 0.9$  |

| 1G-16                           | 1      | 2      | 3      | 4      | average          |
|---------------------------------|--------|--------|--------|--------|------------------|
| $\eta(\%)$                      | 2.63   | 2.79   | 3.08   | 2.87   | $2.84 \pm 0.19$  |
| $J_{sc}(\text{mA}/\text{cm}^2)$ | 5.12   | 5.23   | 5.66   | 5.24   | $5.31 \pm 0.24$  |
| $V_{oc}(\text{mV})$             | 691.04 | 690.23 | 716.62 | 712.62 | $702.6 \pm 14.0$ |
| FF(%)                           | 74.41  | 77.16  | 76.01  | 76.84  | $76.1 \pm 1.2$   |

| 1G-17                           | 1      | 2      | 3      | 4      | average         |
|---------------------------------|--------|--------|--------|--------|-----------------|
| $\eta(\%)$                      | 1.57   | 1.56   | 1.73   | 1.64   | $1.63 \pm 0.08$ |
| $J_{sc}(\text{mA}/\text{cm}^2)$ | 2.91   | 3.01   | 3.17   | 3.10   | $3.05 \pm 0.11$ |
| $V_{oc}(\text{mV})$             | 687.04 | 684.63 | 686.23 | 685.44 | $685.8 \pm 1.0$ |
| FF(%)                           | 78.54  | 75.82  | 79.44  | 77.31  | $77.8 \pm 1.6$  |

| 1G-18                           | 1      | 2      | 3      | 4      | average         |
|---------------------------------|--------|--------|--------|--------|-----------------|
| $\eta(\%)$                      | 4.33   | 4.25   | 4.38   | 4.48   | $4.36 \pm 0.10$ |
| $J_{sc}(\text{mA}/\text{cm}^2)$ | 8.05   | 8.07   | 8.21   | 8.28   | $8.15 \pm 0.11$ |
| $V_{oc}(\text{mV})$             | 703.03 | 691.83 | 693.43 | 707.02 | $698.8 \pm 7.4$ |
| FF(%)                           | 76.57  | 76.08  | 76.96  | 76.54  | $76.5 \pm 0.4$  |

| 1G-19                           | 1      | 2      | 3      | 4      | average         |
|---------------------------------|--------|--------|--------|--------|-----------------|
| $\eta(\%)$                      | 2.82   | 2.64   | 2.67   | 2.73   | $2.72 \pm 0.08$ |
| $J_{sc}(\text{mA}/\text{cm}^2)$ | 5.23   | 4.72   | 4.80   | 4.94   | $4.92 \pm 0.22$ |
| $V_{oc}(\text{mV})$             | 710.23 | 702.23 | 711.02 | 707.83 | $707.8 \pm 4.0$ |
| FF(%)                           | 76.01  | 79.68  | 78.25  | 78.05  | $78.0 \pm 1.5$  |

| 1G-20                           | 1      | 2      | 3      | 4      | average         |
|---------------------------------|--------|--------|--------|--------|-----------------|
| $\eta(\%)$                      | 1.94   | 1.88   | 1.79   | 1.81   | $1.86 \pm 0.07$ |
| $J_{sc}(\text{mA}/\text{cm}^2)$ | 3.54   | 3.52   | 3.26   | 3.30   | $3.41 \pm 0.15$ |
| $V_{oc}(\text{mV})$             | 710.23 | 714.22 | 715.02 | 718.22 | $714.4 \pm 3.3$ |
| FF(%)                           | 77.28  | 74.84  | 76.56  | 76.59  | $76.3 \pm 1.0$  |

### 1<sup>st</sup> Generation : Cell parameters for 4 independent samples (1G-21 ~ 1G-30)

| 1G-21                           | 1      | 2      | 3      | 4      | average         |
|---------------------------------|--------|--------|--------|--------|-----------------|
| $\eta(\%)$                      | 2.91   | 2.91   | 2.95   | 2.90   | $2.92 \pm 0.02$ |
| $J_{sc}(\text{mA}/\text{cm}^2)$ | 5.26   | 5.68   | 5.40   | 5.21   | $5.39 \pm 0.21$ |
| $V_{oc}(\text{mV})$             | 728.62 | 710.23 | 719.01 | 727.81 | $721.4 \pm 8.6$ |
| FF(%)                           | 75.97  | 72.22  | 75.95  | 76.55  | $75.2 \pm 2.0$  |

| 1G-22                           | 1      | 2      | 3      | 4      | average         |
|---------------------------------|--------|--------|--------|--------|-----------------|
| $\eta(\%)$                      | 4.20   | 4.35   | 4.22   | 4.40   | $4.29 \pm 0.2$  |
| $J_{sc}(\text{mA}/\text{cm}^2)$ | 7.99   | 8.16   | 7.76   | 8.20   | $8.03 \pm 0.2$  |
| $V_{oc}(\text{mV})$             | 696.63 | 696.63 | 702.23 | 699.03 | $698.6 \pm 2.7$ |
| FF(%)                           | 75.41  | 76.44  | 77.35  | 76.70  | $76.5 \pm 0.8$  |

| 1G-23                           | 1      | 2      | 3      | 4      | average         |
|---------------------------------|--------|--------|--------|--------|-----------------|
| $\eta(\%)$                      | 3.60   | 3.61   | 3.70   | 3.87   | $3.70 \pm 0.13$ |
| $J_{sc}(\text{mA}/\text{cm}^2)$ | 7.10   | 7.31   | 7.34   | 7.73   | $7.37 \pm 0.26$ |
| $V_{oc}(\text{mV})$             | 670.25 | 658.26 | 664.65 | 665.45 | $664.7 \pm 4.9$ |
| FF(%)                           | 75.72  | 75.07  | 75.89  | 75.24  | $75.5 \pm 0.4$  |

| 1G-24                           | 1      | 2      | 3      | 4      | average         |
|---------------------------------|--------|--------|--------|--------|-----------------|
| $\eta(\%)$                      | 4.38   | 4.60   | 4.40   | 4.60   | $4.50 \pm 0.12$ |
| $J_{sc}(\text{mA}/\text{cm}^2)$ | 8.40   | 8.85   | 8.55   | 8.79   | $8.65 \pm 0.21$ |
| $V_{oc}(\text{mV})$             | 683.04 | 684.63 | 677.45 | 691.83 | $684.4 \pm 5.9$ |
| FF(%)                           | 76.28  | 75.85  | 75.94  | 75.70  | $75.9 \pm 0.3$  |

| 1G-25                           | 1      | 2      | 3      | 4      | average         |
|---------------------------------|--------|--------|--------|--------|-----------------|
| $\eta(\%)$                      | 4.15   | 4.00   | 4.00   | 3.97   | $4.03 \pm 0.08$ |
| $J_{sc}(\text{mA}/\text{cm}^2)$ | 7.32   | 7.04   | 6.99   | 7.00   | $7.09 \pm 0.16$ |
| $V_{oc}(\text{mV})$             | 743.00 | 743.81 | 743.00 | 742.21 | $743.0 \pm 0.7$ |
| FF(%)                           | 76.34  | 76.51  | 76.99  | 76.42  | $76.6 \pm 0.3$  |

| 1G-26                           | 1      | 2      | 3      | 4      | average          |
|---------------------------------|--------|--------|--------|--------|------------------|
| $\eta(\%)$                      | 4.34   | 4.28   | 4.23   | 4.39   | $4.31 \pm 0.07$  |
| $J_{sc}(\text{mA}/\text{cm}^2)$ | 7.90   | 8.04   | 8.08   | 8.39   | $8.10 \pm 0.21$  |
| $V_{oc}(\text{mV})$             | 723.02 | 695.03 | 690.23 | 697.43 | $701.4 \pm 14.7$ |
| FF(%)                           | 75.98  | 76.56  | 75.82  | 75.05  | $75.9 \pm 0.6$   |

| 1G-27                           | 1      | 2      | 3      | 4      | average         |
|---------------------------------|--------|--------|--------|--------|-----------------|
| $\eta(\%)$                      | 4.98   | 4.95   | 4.90   | 4.93   | $4.94 \pm 0.03$ |
| $J_{sc}(\text{mA}/\text{cm}^2)$ | 9.02   | 9.49   | 9.15   | 8.97   | $9.16 \pm 0.23$ |
| $V_{oc}(\text{mV})$             | 738.21 | 715.02 | 729.41 | 731.81 | $728.6 \pm 9.8$ |
| FF(%)                           | 74.83  | 72.97  | 73.39  | 75.16  | $74.1 \pm 1.1$  |

| 1G-28                           | 1      | 2      | 3      | 4      | average          |
|---------------------------------|--------|--------|--------|--------|------------------|
| $\eta(\%)$                      | 4.72   | 4.90   | 4.63   | 4.84   | $4.77 \pm 0.12$  |
| $J_{sc}(\text{mA}/\text{cm}^2)$ | 8.34   | 8.68   | 8.15   | 9.07   | $8.56 \pm 0.40$  |
| $V_{oc}(\text{mV})$             | 733.41 | 732.62 | 734.22 | 713.43 | $728.4 \pm 10.0$ |
| FF(%)                           | 77.18  | 77.07  | 77.31  | 74.75  | $76.6 \pm 1.2$   |

| 1G-29                           | 1      | 2      | 3      | 4      | average         |
|---------------------------------|--------|--------|--------|--------|-----------------|
| $\eta(\%)$                      | 4.38   | 4.11   | 4.22   | 4.28   | $4.25 \pm 0.11$ |
| $J_{sc}(\text{mA}/\text{cm}^2)$ | 7.97   | 7.64   | 7.55   | 7.62   | $7.70 \pm 0.19$ |
| $V_{oc}(\text{mV})$             | 718.22 | 710.23 | 724.61 | 719.82 | $718.2 \pm 6.0$ |
| FF(%)                           | 76.50  | 75.78  | 77.24  | 78.02  | $76.9 \pm 1.0$  |

| 1G-30                           | 1      | 2      | 3      | 4      | average         |
|---------------------------------|--------|--------|--------|--------|-----------------|
| $\eta(\%)$                      | 3.43   | 3.15   | 3.16   | 3.36   | $3.28 \pm 0.14$ |
| $J_{sc}(\text{mA}/\text{cm}^2)$ | 6.06   | 5.52   | 5.59   | 6.07   | $5.81 \pm 0.30$ |
| $V_{oc}(\text{mV})$             | 743.81 | 746.21 | 748.60 | 741.40 | $745.0 \pm 3.1$ |
| FF(%)                           | 76.14  | 76.46  | 75.57  | 74.63  | $75.7 \pm 0.9$  |

## 2<sup>nd</sup> Generation : Decision parameters and cell efficiencies

|       | Composition of TiO <sub>2</sub> (wt%) |    |    |    | Relative amount of dyes on TiO <sub>2</sub> |    |    |    | Relative film thickness | Pressure applied (Mpa) | η(%)        |
|-------|---------------------------------------|----|----|----|---------------------------------------------|----|----|----|-------------------------|------------------------|-------------|
|       | T1                                    | T2 | T3 | T4 | T1                                          | T2 | T3 | T4 |                         |                        |             |
| 2G-1  | 20                                    | 40 | 20 | 20 | D1                                          | D4 | D3 | D4 | F7                      | 50                     | 3.88 ± 0.07 |
| 2G-2  | 30                                    | 30 | 20 | 20 | D3                                          | D4 | D1 | D4 | F5                      | 28                     | 3.42 ± 0.09 |
| 2G-3  | 20                                    | 40 | 20 | 20 | D3                                          | D3 | D1 | D3 | F5                      | 50                     | 3.48 ± 0.19 |
| 2G-4  | 0                                     | 30 | 40 | 30 | D4                                          | D4 | D3 | D4 | F6                      | 72                     | 4.59 ± 0.14 |
| 2G-5  | 0                                     | 50 | 20 | 30 | D4                                          | D2 | D3 | D3 | F6                      | 72                     | 4.46 ± 0.20 |
| 2G-6  | 0                                     | 30 | 50 | 20 | D4                                          | D1 | D4 | D4 | F3                      | 72                     | 4.70 ± 0.10 |
| 2G-7  | 0                                     | 40 | 30 | 30 | D2                                          | D3 | D1 | D3 | F6                      | 94                     | 5.31 ± 0.06 |
| 2G-8  | 20                                    | 40 | 20 | 20 | D1                                          | D4 | D1 | D4 | F7                      | 50                     | 4.07 ± 0.13 |
| 2G-9  | 20                                    | 20 | 40 | 20 | D2                                          | D1 | D3 | D4 | F6                      | 94                     | 4.33 ± 0.08 |
| 2G-10 | 20                                    | 60 | 20 | 0  | D3                                          | D2 | D2 | D3 | F5                      | 94                     | 4.57 ± 0.08 |
| 2G-11 | 20                                    | 60 | 20 | 0  | D2                                          | D3 | D3 | D4 | F5                      | 28                     | 3.53 ± 0.09 |
| 2G-12 | 20                                    | 50 | 30 | 0  | D3                                          | D3 | D3 | D4 | F4                      | 28                     | 3.43 ± 0.07 |
| 2G-13 | 0                                     | 40 | 30 | 30 | D3                                          | D1 | D1 | D4 | F4                      | 94                     | 4.34 ± 0.03 |
| 2G-14 | 10                                    | 60 | 20 | 10 | D3                                          | D4 | D4 | D4 | F5                      | 94                     | 4.36 ± 0.16 |
| 2G-15 | 0                                     | 90 | 10 | 0  | D3                                          | D4 | D2 | D1 | F3                      | 72                     | 3.35 ± 0.15 |
| 2G-16 | 0                                     | 0  | 70 | 30 | D2                                          | D3 | D4 | D3 | F4                      | 28                     | 3.79 ± 0.09 |
| 2G-17 | 10                                    | 30 | 30 | 30 | D1                                          | D4 | D2 | D4 | F3                      | 28                     | 2.45 ± 0.10 |
| 2G-18 | 20                                    | 20 | 60 | 0  | D2                                          | D3 | D4 | D3 | F8                      | 50                     | 3.99 ± 0.16 |
| 2G-19 | 0                                     | 60 | 20 | 20 | D4                                          | D3 | D3 | D1 | F5                      | 50                     | 4.50 ± 0.09 |
| 2G-20 | 20                                    | 40 | 40 | 0  | D3                                          | D4 | D3 | D4 | F6                      | 28                     | 3.94 ± 0.05 |
| 2G-21 | 0                                     | 20 | 80 | 0  | D4                                          | D1 | D2 | D4 | F8                      | 28                     | 4.85 ± 0.14 |
| 2G-22 | 10                                    | 0  | 60 | 30 | D2                                          | D1 | D4 | D4 | F2                      | 94                     | 3.55 ± 0.17 |
| 2G-23 | 10                                    | 10 | 60 | 20 | D3                                          | D4 | D2 | D1 | F7                      | 50                     | 5.04 ± 0.07 |
| 2G-24 | 20                                    | 40 | 20 | 20 | D2                                          | D3 | D1 | D4 | F3                      | 50                     | 3.73 ± 0.21 |
| 2G-25 | 0                                     | 40 | 30 | 30 | D1                                          | D4 | D1 | D3 | F7                      | 94                     | 5.23 ± 0.01 |
| 2G-26 | 30                                    | 10 | 40 | 20 | D2                                          | D3 | D3 | D2 | F8                      | 94                     | 3.89 ± 0.10 |
| 2G-27 | 0                                     | 70 | 10 | 20 | D3                                          | D1 | D3 | D1 | F1                      | 72                     | 2.48 ± 0.10 |
| 2G-28 | 30                                    | 20 | 40 | 10 | D2                                          | D1 | D4 | D3 | F2                      | 94                     | 3.80 ± 0.20 |
| 2G-29 | 30                                    | 20 | 40 | 10 | D2                                          | D4 | D2 | D3 | F1                      | 72                     | 3.51 ± 0.14 |
| 2G-30 | 0                                     | 40 | 30 | 30 | D2                                          | D3 | D1 | D3 | F5                      | 94                     | 4.90 ± 0.21 |

(red color) the highest η used for the next generation (Elicitism)

## 2<sup>nd</sup> Generation : Cell parameters for 4 independent samples (2G-1 ~ 2G-10)

| 2G-1                            | 1      | 2      | 3      | 4      | average          |
|---------------------------------|--------|--------|--------|--------|------------------|
| $\eta(\%)$                      | 3.81   | 3.82   | 3.93   | 3.95   | $3.88 \pm 0.07$  |
| $J_{sc}(\text{mA}/\text{cm}^2)$ | 7.48   | 7.40   | 7.54   | 7.99   | $7.60 \pm 0.26$  |
| $V_{oc}(\text{mV})$             | 664.65 | 679.84 | 676.64 | 658.26 | $669.9 \pm 10.1$ |
| FF(%)                           | 76.66  | 75.87  | 77.03  | 75.06  | $76.2 \pm 0.9$   |

| 2G-2                            | 1      | 2      | 3      | 4      | average           |
|---------------------------------|--------|--------|--------|--------|-------------------|
| $\eta(\%)$                      | 3.37   | 3.33   | 3.42   | 3.54   | $3.42 \pm 0.09$   |
| $J_{sc}(\text{mA}/\text{cm}^2)$ | 6.27   | 6.30   | 6.40   | 6.31   | $6.32 \pm 0.06$   |
| $V_{oc}(\text{mV})$             | 688.64 | 688.64 | 686.23 | 726.21 | $697.43 \pm 19.2$ |
| FF(%)                           | 78.10  | 76.77  | 77.92  | 77.24  | $77.5 \pm 0.6$    |

| 2G-3                            | 1      | 2      | 3      | 4      | average          |
|---------------------------------|--------|--------|--------|--------|------------------|
| $\eta(\%)$                      | 3.42   | 3.33   | 3.40   | 3.76   | $3.48 \pm 0.19$  |
| $J_{sc}(\text{mA}/\text{cm}^2)$ | 5.91   | 5.92   | 6.38   | 7.23   | $6.36 \pm 0.62$  |
| $V_{oc}(\text{mV})$             | 735.81 | 730.21 | 695.83 | 694.24 | $714.0 \pm 22.1$ |
| FF(%)                           | 78.58  | 76.88  | 76.51  | 75.00  | $76.7 \pm 1.47$  |

| 2G-4                            | 1      | 2      | 3      | 4      | average           |
|---------------------------------|--------|--------|--------|--------|-------------------|
| $\eta(\%)$                      | 4.74   | 4.47   | 4.47   | 4.68   | $4.59 \pm 0.14$   |
| $J_{sc}(\text{mA}/\text{cm}^2)$ | 9.12   | 8.64   | 8.65   | 9.33   | $8.94 \pm 0.35$   |
| $V_{oc}(\text{mV})$             | 692.64 | 688.64 | 693.43 | 679.84 | $6.88.6 \pm 6.23$ |
| FF(%)                           | 74.96  | 75.19  | 74.55  | 73.87  | $74.64 \pm 0.58$  |

| 2G-5                            | 1      | 2      | 3      | 4      | average          |
|---------------------------------|--------|--------|--------|--------|------------------|
| $\eta(\%)$                      | 4.31   | 4.51   | 4.73   | 4.30   | $4.46 \pm 0.20$  |
| $J_{sc}(\text{mA}/\text{cm}^2)$ | 8.69   | 9.00   | 9.27   | 7.91   | $8.72 \pm 0.59$  |
| $V_{oc}(\text{mV})$             | 662.25 | 687.04 | 681.44 | 710.23 | $685.2 \pm 19.8$ |
| FF(%)                           | 74.94  | 72.87  | 74.79  | 76.59  | $74.8 \pm 1.5$   |

| 2G-6                            | 1      | 2      | 3      | 4      | average         |
|---------------------------------|--------|--------|--------|--------|-----------------|
| $\eta(\%)$                      | 4.71   | 4.67   | 4.83   | 4.59   | $4.70 \pm 0.10$ |
| $J_{sc}(\text{mA}/\text{cm}^2)$ | 9.33   | 9.84   | 9.43   | 9.20   | $9.45 \pm 0.28$ |
| $V_{oc}(\text{mV})$             | 674.24 | 667.05 | 678.24 | 672.64 | $673.0 \pm 4.6$ |
| FF(%)                           | 74.84  | 71.16  | 75.56  | 74.10  | $73.9 \pm 1.9$  |

| 2G-7                            | 1      | 2      | 3      | 4      | average          |
|---------------------------------|--------|--------|--------|--------|------------------|
| $\eta(\%)$                      | 5.25   | 5.31   | 5.39   | 5.29   | $5.31 \pm 0.06$  |
| $J_{sc}(\text{mA}/\text{cm}^2)$ | 10.19  | 10.33  | 10.41  | 10.18  | $10.28 \pm 0.11$ |
| $V_{oc}(\text{mV})$             | 693.43 | 699.03 | 699.03 | 708.62 | $700.0 \pm 6.3$  |
| FF(%)                           | 74.28  | 73.6   | 74.02  | 73.39  | $73.8 \pm 0.4$   |

| 2G-8                            | 1      | 2      | 3      | 4      | average         |
|---------------------------------|--------|--------|--------|--------|-----------------|
| $\eta(\%)$                      | 4.19   | 3.89   | 4.11   | 4.07   | $4.07 \pm 0.13$ |
| $J_{sc}(\text{mA}/\text{cm}^2)$ | 8.39   | 7.35   | 7.98   | 7.99   | $7.93 \pm 0.43$ |
| $V_{oc}(\text{mV})$             | 668.65 | 678.24 | 669.44 | 667.85 | $671.1 \pm 4.8$ |
| FF(%)                           | 74.73  | 77.96  | 76.99  | 76.28  | $76.5 \pm 1.4$  |

| 2G-9                            | 1      | 2      | 3      | 4      | average         |
|---------------------------------|--------|--------|--------|--------|-----------------|
| $\eta(\%)$                      | 4.26   | 4.27   | 4.36   | 4.44   | $4.33 \pm 0.08$ |
| $J_{sc}(\text{mA}/\text{cm}^2)$ | 8.83   | 9.19   | 8.81   | 9.12   | $8.99 \pm 0.20$ |
| $V_{oc}(\text{mV})$             | 659.05 | 652.66 | 659.05 | 655.06 | $656.5 \pm 3.2$ |
| FF(%)                           | 73.10  | 71.27  | 74.98  | 74.28  | $73.41 \pm 1.6$ |

| 2G-10                           | 1      | 2      | 3      | 4      | average         |
|---------------------------------|--------|--------|--------|--------|-----------------|
| $\eta(\%)$                      | 4.67   | 4.58   | 4.50   | 4.52   | $4.57 \pm 0.08$ |
| $J_{sc}(\text{mA}/\text{cm}^2)$ | 9.04   | 8.63   | 8.75   | 8.73   | $8.79 \pm 0.18$ |
| $V_{oc}(\text{mV})$             | 680.64 | 687.04 | 680.64 | 683.84 | $683.0 \pm 3.1$ |
| FF(%)                           | 75.83  | 77.23  | 75.46  | 75.63  | $76.0 \pm 0.8$  |

## 2<sup>nd</sup> Generation : Cell parameters for 4 independent samples (2G-11 ~ 2G-20)

| 2G-11                          | 1      | 2      | 3      | 4      | average         |
|--------------------------------|--------|--------|--------|--------|-----------------|
| $\eta$ (%)                     | 3.51   | 3.46   | 3.48   | 3.66   | $3.53 \pm 0.09$ |
| $J_{sc}$ (mA/cm <sup>2</sup> ) | 6.56   | 6.51   | 6.51   | 7.18   | $6.69 \pm 0.33$ |
| $V_{oc}$ (mV)                  | 691.04 | 692.64 | 693.43 | 695.83 | $693.2 \pm 2.0$ |
| FF(%)                          | 77.44  | 76.73  | 77.00  | 73.29  | $76.1 \pm 1.9$  |

| 2G-12                          | 1      | 2      | 3      | 4      | average         |
|--------------------------------|--------|--------|--------|--------|-----------------|
| $\eta$ (%)                     | 3.37   | 3.47   | 3.37   | 3.51   | $3.43 \pm 0.07$ |
| $J_{sc}$ (mA/cm <sup>2</sup> ) | 6.43   | 6.54   | 6.32   | 6.56   | $6.46 \pm 0.11$ |
| $V_{oc}$ (mV)                  | 689.44 | 688.64 | 683.84 | 688.64 | $687.6 \pm 2.6$ |
| FF(%)                          | 75.92  | 77.05  | 78.08  | 77.76  | $77.2 \pm 1.0$  |

| 2G-13                          | 1      | 2      | 3      | 4      | average         |
|--------------------------------|--------|--------|--------|--------|-----------------|
| $\eta$ (%)                     | 4.34   | 4.38   | 4.32   | 4.32   | $4.34 \pm 0.03$ |
| $J_{sc}$ (mA/cm <sup>2</sup> ) | 8.49   | 8.55   | 8.47   | 8.50   | $8.50 \pm 0.03$ |
| $V_{oc}$ (mV)                  | 675.04 | 675.85 | 674.24 | 675.04 | $675.0 \pm 0.7$ |
| FF(%)                          | 75.78  | 75.85  | 75.57  | 75.38  | $75.7 \pm 0.2$  |

| 2G-14                          | 1      | 2      | 3      | 4      | average          |
|--------------------------------|--------|--------|--------|--------|------------------|
| $\eta$ (%)                     | 4.32   | 4.14   | 4.48   | 4.49   | $4.36 \pm 0.16$  |
| $J_{sc}$ (mA/cm <sup>2</sup> ) | 8.47   | 7.59   | 8.21   | 8.23   | $8.13 \pm 0.38$  |
| $V_{oc}$ (mV)                  | 674.24 | 700.63 | 713.43 | 715.02 | $700.8 \pm 18.9$ |
| FF(%)                          | 75.57  | 77.89  | 76.44  | 76.32  | $76.6 \pm 1.0$   |

| 2G-15                          | 1      | 2      | 3      | 4      | average         |
|--------------------------------|--------|--------|--------|--------|-----------------|
| $\eta$ (%)                     | 3.39   | 3.47   | 3.40   | 3.12   | $3.35 \pm 0.15$ |
| $J_{sc}$ (mA/cm <sup>2</sup> ) | 6.24   | 6.52   | 6.24   | 5.81   | $6.20 \pm 0.29$ |
| $V_{oc}$ (mV)                  | 714.22 | 710.23 | 714.22 | 712.62 | $712.8 \pm 1.9$ |
| FF(%)                          | 75.91  | 75.01  | 76.33  | 75.47  | $75.7 \pm 0.6$  |

| 2G-16                          | 1      | 2      | 3      | 4      | average         |
|--------------------------------|--------|--------|--------|--------|-----------------|
| $\eta$ (%)                     | 3.66   | 3.85   | 3.83   | 3.80   | $3.79 \pm 0.09$ |
| $J_{sc}$ (mA/cm <sup>2</sup> ) | 6.68   | 7.15   | 7.09   | 6.91   | $6.96 \pm 0.21$ |
| $V_{oc}$ (mV)                  | 724.61 | 708.62 | 708.62 | 718.22 | $715.0 \pm 7.8$ |
| FF(%)                          | 75.63  | 76.01  | 76.14  | 76.56  | $76.1 \pm 0.4$  |

| 2G-17                          | 1      | 2      | 3      | 4      | average         |
|--------------------------------|--------|--------|--------|--------|-----------------|
| $\eta$ (%)                     | 2.60   | 2.37   | 2.40   | 2.42   | $2.45 \pm 0.10$ |
| $J_{sc}$ (mA/cm <sup>2</sup> ) | 4.67   | 4.89   | 5.15   | 5.18   | $4.97 \pm 0.24$ |
| $V_{oc}$ (mV)                  | 719.01 | 702.23 | 715.02 | 713.43 | $712.4 \pm 7.2$ |
| FF(%)                          | 77.23  | 68.95  | 65.10  | 65.45  | $69.2 \pm 5.6$  |

| 2G-18                          | 1      | 2      | 3      | 4      | average         |
|--------------------------------|--------|--------|--------|--------|-----------------|
| $\eta$ (%)                     | 3.85   | 4.04   | 4.19   | 3.87   | $3.99 \pm 0.16$ |
| $J_{sc}$ (mA/cm <sup>2</sup> ) | 8.84   | 8.60   | 8.94   | 9.05   | $8.86 \pm 0.19$ |
| $V_{oc}$ (mV)                  | 660.65 | 651.06 | 660.65 | 642.26 | $653.7 \pm 8.8$ |
| FF(%)                          | 65.92  | 72.10  | 70.99  | 66.47  | $68.9 \pm 3.1$  |

| 2G-19                          | 1      | 2      | 3      | 4      | average         |
|--------------------------------|--------|--------|--------|--------|-----------------|
| $\eta$ (%)                     | 4.60   | 4.54   | 4.47   | 4.40   | $4.50 \pm 0.09$ |
| $J_{sc}$ (mA/cm <sup>2</sup> ) | 8.75   | 9.31   | 8.67   | 8.53   | $8.82 \pm 0.34$ |
| $V_{oc}$ (mV)                  | 698.24 | 700.63 | 707.83 | 698.24 | $701.2 \pm 4.5$ |
| FF(%)                          | 75.32  | 69.65  | 72.88  | 73.90  | $72.9 \pm 2.4$  |

| 2G-20                          | 1      | 2      | 3      | 4      | average          |
|--------------------------------|--------|--------|--------|--------|------------------|
| $\eta$ (%)                     | 4.00   | 3.93   | 3.96   | 3.87   | $3.94 \pm 0.05$  |
| $J_{sc}$ (mA/cm <sup>2</sup> ) | 8.03   | 7.78   | 7.83   | 7.15   | $7.70 \pm 0.38$  |
| $V_{oc}$ (mV)                  | 673.45 | 679.84 | 681.44 | 705.42 | $685.0 \pm 14.0$ |
| FF(%)                          | 74.03  | 74.22  | 74.19  | 76.66  | $74.8 \pm 1.3$   |

## 2<sup>nd</sup> Generation : Cell parameters for 4 independent samples (2G-21 ~ 2G-30)

| 2G-21                          | 1      | 2      | 3      | 4      | average          |
|--------------------------------|--------|--------|--------|--------|------------------|
| $\eta$ (%)                     | 5.05   | 4.85   | 4.72   | 4.78   | $4.85 \pm 0.14$  |
| $J_{sc}$ (mA/cm <sup>2</sup> ) | 10.52  | 10.64  | 9.83   | 9.96   | $10.24 \pm 0.40$ |
| $V_{oc}$ (mV)                  | 663.86 | 635.87 | 694.24 | 691.04 | $671.3 \pm 27.2$ |
| FF(%)                          | 72.29  | 71.62  | 69.16  | 69.47  | $70.6 \pm 1.6$   |

| 2G-22                          | 1      | 2      | 3      | 4      | average         |
|--------------------------------|--------|--------|--------|--------|-----------------|
| $\eta$ (%)                     | 3.42   | 3.39   | 3.66   | 3.72   | $3.55 \pm 0.17$ |
| $J_{sc}$ (mA/cm <sup>2</sup> ) | 6.25   | 6.26   | 7.03   | 7.09   | $6.66 \pm 0.47$ |
| $V_{oc}$ (mV)                  | 701.43 | 707.02 | 696.63 | 699.03 | $701.0 \pm 4.5$ |
| FF(%)                          | 77.94  | 76.63  | 74.77  | 75.11  | $76.1 \pm 1.5$  |

| 2G-23                          | 1      | 2      | 3      | 4      | average         |
|--------------------------------|--------|--------|--------|--------|-----------------|
| $\eta$ (%)                     | 4.93   | 5.07   | 5.07   | 5.09   | $5.04 \pm 0.07$ |
| $J_{sc}$ (mA/cm <sup>2</sup> ) | 9.40   | 10.46  | 9.87   | 9.58   | $9.83 \pm 0.46$ |
| $V_{oc}$ (mV)                  | 688.64 | 676.64 | 687.84 | 692.64 | $686.4 \pm 6.9$ |
| FF(%)                          | 76.13  | 71.60  | 74.72  | 76.79  | $74.8 \pm 2.3$  |

| 2G-24                          | 1      | 2      | 3      | 4      | average         |
|--------------------------------|--------|--------|--------|--------|-----------------|
| $\eta$ (%)                     | 4.03   | 3.59   | 3.73   | 3.56   | $3.73 \pm 0.21$ |
| $J_{sc}$ (mA/cm <sup>2</sup> ) | 7.28   | 6.79   | 6.84   | 6.51   | $6.86 \pm 0.3$  |
| $V_{oc}$ (mV)                  | 703.03 | 693.43 | 695.83 | 702.23 | $689.6 \pm 4.7$ |
| FF(%)                          | 78.79  | 76.24  | 78.30  | 77.97  | $77.8 \pm 1.1$  |

| 2G-25                          | 1      | 2      | 3      | 4      | average          |
|--------------------------------|--------|--------|--------|--------|------------------|
| $\eta$ (%)                     | 5.24   | 5.22   | 5.23   | 5.21   | $5.23 \pm 0.01$  |
| $J_{sc}$ (mA/cm <sup>2</sup> ) | 10.86  | 10.64  | 10.19  | 9.77   | $10.37 \pm 0.48$ |
| $V_{oc}$ (mV)                  | 671.85 | 686.23 | 707.02 | 709.42 | $693.6 \pm 17.9$ |
| FF(%)                          | 71.78  | 71.46  | 72.51  | 75.19  | $72.7 \pm 1.7$   |

| 2G-26                          | 1      | 2      | 3      | 4      | average         |
|--------------------------------|--------|--------|--------|--------|-----------------|
| $\eta$ (%)                     | 3.96   | 3.88   | 3.75   | 3.98   | $3.89 \pm 0.10$ |
| $J_{sc}$ (mA/cm <sup>2</sup> ) | 8.62   | 8.46   | 8.13   | 8.36   | $8.39 \pm 0.21$ |
| $V_{oc}$ (mV)                  | 638.26 | 639.86 | 640.66 | 647.06 | $641.5 \pm 3.9$ |
| FF(%)                          | 71.89  | 71.66  | 72.13  | 73.50  | $72.3 \pm 0.8$  |

| 2G-27                          | 1      | 2      | 3      | 4      | average          |
|--------------------------------|--------|--------|--------|--------|------------------|
| $\eta$ (%)                     | 2.61   | 2.37   | 2.43   | 2.51   | $2.48 \pm 0.10$  |
| $J_{sc}$ (mA/cm <sup>2</sup> ) | 4.54   | 4.32   | 4.38   | 4.54   | $4.45 \pm 0.11$  |
| $V_{oc}$ (mV)                  | 728.62 | 704.63 | 706.23 | 709.42 | $712.2 \pm 11.1$ |
| FF(%)                          | 78.92  | 78.02  | 78.54  | 77.75  | $78.3 \pm 0.5$   |

| 2G-28                          | 1      | 2      | 3      | 4      | average         |
|--------------------------------|--------|--------|--------|--------|-----------------|
| $\eta$ (%)                     | 4.01   | 3.77   | 3.53   | 3.88   | $3.80 \pm 0.20$ |
| $J_{sc}$ (mA/cm <sup>2</sup> ) | 7.62   | 7.20   | 6.71   | 7.50   | $7.26 \pm 0.41$ |
| $V_{oc}$ (mV)                  | 685.44 | 682.24 | 683.04 | 686.23 | $684.2 \pm 1.9$ |
| FF(%)                          | 76.80  | 76.61  | 77.04  | 75.53  | $76.5 \pm 0.7$  |

| 2G-29                          | 1      | 2      | 3      | 4      | average         |
|--------------------------------|--------|--------|--------|--------|-----------------|
| $\eta$ (%)                     | 3.41   | 3.46   | 3.72   | 3.45   | $3.51 \pm 0.14$ |
| $J_{sc}$ (mA/cm <sup>2</sup> ) | 6.16   | 6.21   | 6.71   | 6.07   | $6.29 \pm 0.29$ |
| $V_{oc}$ (mV)                  | 713.43 | 712.62 | 711.02 | 723.82 | $715.2 \pm 5.8$ |
| FF(%)                          | 77.67  | 78.20  | 77.85  | 78.53  | $78.1 \pm 0.4$  |

| 2G-30                          | 1      | 2      | 3      | 4      | average          |
|--------------------------------|--------|--------|--------|--------|------------------|
| $\eta$ (%)                     | 5.08   | 5.10   | 4.73   | 4.70   | $4.90 \pm 0.20$  |
| $J_{sc}$ (mA/cm <sup>2</sup> ) | 9.02   | 9.55   | 8.96   | 8.65   | $9.16 \pm 0.37$  |
| $V_{oc}$ (mV)                  | 754.58 | 742.72 | 720.46 | 730.96 | $728.6 \pm 14.7$ |
| FF(%)                          | 74.64  | 71.90  | 73.27  | 74.33  | $73.5 \pm 1.2$   |

### 3<sup>rd</sup> Generation : Decision parameters and cell efficiencies

|              | Composition of TiO <sub>2</sub> (wt%) |    |    |    | Relative amount of dyes on TiO <sub>2</sub> |    |    |    | Relative film thickness | Pressure applied (Mpa) | η(%)        |
|--------------|---------------------------------------|----|----|----|---------------------------------------------|----|----|----|-------------------------|------------------------|-------------|
|              | T1                                    | T2 | T3 | T4 | T1                                          | T2 | T3 | T4 |                         |                        |             |
| <b>3G-1</b>  | 10                                    | 60 | 20 | 10 | D4                                          | D4 | D4 | D4 | F5                      | 94                     | 4.20 ± 0.11 |
| <b>3G-2</b>  | 0                                     | 40 | 30 | 30 | D2                                          | D3 | D1 | D3 | F8                      | 94                     | 5.02 ± 0.10 |
| <b>3G-3</b>  | 30                                    | 20 | 40 | 10 | D2                                          | D1 | D4 | D3 | F5                      | 94                     | 3.58 ± 0.11 |
| <b>3G-4</b>  | 20                                    | 60 | 20 | 0  | D3                                          | D2 | D2 | D3 | F2                      | 94                     | 4.26 ± 0.07 |
| <b>3G-5</b>  | 0                                     | 40 | 30 | 30 | D2                                          | D3 | D1 | D3 | F8                      | 72                     | 5.00 ± 0.17 |
| <b>3G-6</b>  | 20                                    | 40 | 20 | 20 | D1                                          | D4 | D3 | D4 | F8                      | 50                     | 3.67 ± 0.04 |
| <b>3G-7</b>  | 10                                    | 60 | 20 | 10 | D4                                          | D2 | D3 | D3 | F8                      | 28                     | 3.67 ± 0.14 |
| <b>3G-8</b>  | 10                                    | 10 | 80 | 0  | D4                                          | D1 | D2 | D4 | F6                      | 72                     | 5.08 ± 0.08 |
| <b>3G-9</b>  | 10                                    | 50 | 20 | 20 | D1                                          | D4 | D1 | D4 | F2                      | 94                     | 3.95 ± 0.05 |
| <b>3G-10</b> | 20                                    | 0  | 60 | 20 | D2                                          | D1 | D4 | D4 | F7                      | 50                     | 4.27 ± 0.12 |
| <b>3G-11</b> | 30                                    | 40 | 30 | 0  | D2                                          | D3 | D1 | D3 | F7                      | 50                     | 4.01 ± 0.05 |
| <b>3G-12</b> | 30                                    | 20 | 20 | 30 | D1                                          | D4 | D1 | D4 | F7                      | 94                     | 3.68 ± 0.13 |
| <b>3G-13</b> | 10                                    | 60 | 30 | 0  | D1                                          | D4 | D1 | D3 | F1                      | 72                     | 3.62 ± 0.19 |
| <b>3G-14</b> | 20                                    | 20 | 40 | 20 | D2                                          | D4 | D2 | D3 | F7                      | 94                     | 4.74 ± 0.07 |
| <b>3G-15</b> | 10                                    | 20 | 60 | 10 | D2                                          | D3 | D4 | D3 | F5                      | 28                     | 3.89 ± 0.16 |
| <b>3G-16</b> | 10                                    | 40 | 20 | 30 | D3                                          | D4 | D1 | D4 | F7                      | 50                     | 4.02 ± 0.07 |
| <b>3G-17</b> | 0                                     | 20 | 80 | 0  | D3                                          | D3 | D2 | D4 | F7                      | 28                     | 4.76 ± 0.11 |
| <b>3G-18</b> | 20                                    | 50 | 30 | 0  | D4                                          | D1 | D3 | D4 | F4                      | 28                     | 3.60 ± 0.13 |
| <b>3G-19</b> | 20                                    | 60 | 20 | 0  | D1                                          | D4 | D1 | D3 | F6                      | 28                     | 3.78 ± 0.07 |
| <b>3G-20</b> | 10                                    | 0  | 80 | 10 | D4                                          | D4 | D4 | D3 | F4                      | 28                     | 3.89 ± 0.12 |
| <b>3G-21</b> | 20                                    | 60 | 20 | 0  | D2                                          | D3 | D3 | D4 | F5                      | 50                     | 3.83 ± 0.05 |
| <b>3G-22</b> | 30                                    | 20 | 40 | 10 | D4                                          | D2 | D4 | D2 | F7                      | 72                     | 3.91 ± 0.02 |
| <b>3G-23</b> | 20                                    | 40 | 10 | 30 | D3                                          | D4 | D4 | D2 | F7                      | 50                     | 3.73 ± 0.10 |
| <b>3G-24</b> | 20                                    | 40 | 20 | 20 | D1                                          | D4 | D3 | D4 | F2                      | 50                     | 2.79 ± 0.11 |
| <b>3G-25</b> | 0                                     | 30 | 40 | 30 | D2                                          | D1 | D3 | D4 | F6                      | 72                     | 4.16 ± 0.16 |
| <b>3G-26</b> | 30                                    | 20 | 40 | 10 | D4                                          | D4 | D4 | D3 | F2                      | 94                     | 3.07 ± 0.12 |
| <b>3G-27</b> | 0                                     | 40 | 30 | 30 | D2                                          | D3 | D1 | D3 | F7                      | 94                     | 5.41 ± 0.07 |
| <b>3G-28</b> | 30                                    | 20 | 20 | 30 | D2                                          | D4 | D1 | D1 | F3                      | 72                     | 2.91 ± 0.18 |
| <b>3G-29</b> | 10                                    | 30 | 50 | 10 | D1                                          | D2 | D2 | D1 | F5                      | 72                     | 4.36 ± 0.21 |
| <b>3G-30</b> | 0                                     | 40 | 30 | 30 | D2                                          | D3 | D1 | D3 | F6                      | 94                     | 5.31 ± 0.06 |

(red color) the highest η used for the next generation (Elicitism)

### 3<sup>rd</sup> Generation : Cell parameters for 4 independent samples (3G-1 ~ 3G-10)

| 3G-1                            | 1      | 2      | 3      | 4      | average          |
|---------------------------------|--------|--------|--------|--------|------------------|
| $\eta(\%)$                      | 4.20   | 4.09   | 4.34   | 4.16   | $4.20 \pm 0.11$  |
| $J_{sc}(\text{mA}/\text{cm}^2)$ | 7.98   | 7.45   | 8.30   | 7.95   | $7.92 \pm 0.35$  |
| $V_{oc}(\text{mV})$             | 705.42 | 726.21 | 716.62 | 703.03 | $712.8 \pm 10.7$ |
| FF(%)                           | 74.56  | 75.55  | 73.07  | 74.41  | $74.4 \pm 1.0$   |

| 3G-2                            | 1      | 2      | 3      | 4      | average          |
|---------------------------------|--------|--------|--------|--------|------------------|
| $\eta(\%)$                      | 5.13   | 4.89   | 5.00   | 5.04   | $5.02 \pm 0.10$  |
| $J_{sc}(\text{mA}/\text{cm}^2)$ | 10.00  | 9.87   | 9.63   | 10.03  | $9.88 \pm 0.18$  |
| $V_{oc}(\text{mV})$             | 708.62 | 687.04 | 711.02 | 686.23 | $698.2 \pm 13.4$ |
| FF(%)                           | 72.38  | 72.08  | 73.10  | 73.22  | $72.7 \pm 0.6$   |

| 3G-3                            | 1      | 2      | 3      | 4      | average         |
|---------------------------------|--------|--------|--------|--------|-----------------|
| $\eta(\%)$                      | 3.55   | 3.50   | 3.52   | 3.73   | $3.58 \pm 0.11$ |
| $J_{sc}(\text{mA}/\text{cm}^2)$ | 6.67   | 6.62   | 6.59   | 6.99   | $6.72 \pm 0.18$ |
| $V_{oc}(\text{mV})$             | 689.44 | 688.64 | 691.83 | 692.64 | $690.6 \pm 1.9$ |
| FF(%)                           | 77.17  | 76.70  | 77.25  | 77.06  | $77.1 \pm 0.2$  |

| 3G-4                            | 1      | 2      | 3      | 4      | average         |
|---------------------------------|--------|--------|--------|--------|-----------------|
| $\eta(\%)$                      | 4.34   | 4.16   | 4.25   | 4.28   | $4.26 \pm 0.07$ |
| $J_{sc}(\text{mA}/\text{cm}^2)$ | 8.22   | 7.71   | 7.99   | 7.98   | $7.98 \pm 0.21$ |
| $V_{oc}(\text{mV})$             | 697.43 | 702.23 | 701.43 | 699.03 | $700.0 \pm 2.2$ |
| FF(%)                           | 75.68  | 76.93  | 75.86  | 76.74  | $76.3 \pm 0.6$  |

| 3G-5                            | 1      | 2      | 3      | 4      | average          |
|---------------------------------|--------|--------|--------|--------|------------------|
| $\eta(\%)$                      | 4.88   | 5.24   | 4.90   | 4.96   | $5.00 \pm 0.17$  |
| $J_{sc}(\text{mA}/\text{cm}^2)$ | 10.14  | 10.60  | 10.05  | 10.28  | $10.27 \pm 0.24$ |
| $V_{oc}(\text{mV})$             | 679.05 | 688.64 | 669.44 | 667.05 | $676.1 \pm 9.9$  |
| FF(%)                           | 70.91  | 71.82  | 72.88  | 72.32  | $72.0 \pm 0.8$   |

| 3G-6                            | 1      | 2      | 3      | 4      | average          |
|---------------------------------|--------|--------|--------|--------|------------------|
| $\eta(\%)$                      | 3.73   | 3.67   | 3.66   | 3.63   | $3.67 \pm 0.04$  |
| $J_{sc}(\text{mA}/\text{cm}^2)$ | 7.70   | 7.44   | 7.75   | 7.16   | $7.51 \pm 0.27$  |
| $V_{oc}(\text{mV})$             | 655.85 | 666.25 | 649.46 | 672.64 | $661.1 \pm 10.4$ |
| FF(%)                           | 73.83  | 74.01  | 72.85  | 75.36  | $74.01 \pm 1.03$ |

| 3G-7                            | 1      | 2      | 3      | 4      | average         |
|---------------------------------|--------|--------|--------|--------|-----------------|
| $\eta(\%)$                      | 3.63   | 3.70   | 3.51   | 3.85   | $3.67 \pm 0.14$ |
| $J_{sc}(\text{mA}/\text{cm}^2)$ | 7.75   | 7.52   | 7.21   | 8.12   | $7.65 \pm 0.38$ |
| $V_{oc}(\text{mV})$             | 655.85 | 670.25 | 655.06 | 659.85 | $660.3 \pm 7.0$ |
| FF(%)                           | 71.45  | 73.45  | 74.23  | 71.92  | $72.8 \pm 1.3$  |

| 3G-8                            | 1      | 2      | 3      | 4      | average          |
|---------------------------------|--------|--------|--------|--------|------------------|
| $\eta(\%)$                      | 4.98   | 5.17   | 5.05   | 5.12   | $5.08 \pm 0.08$  |
| $J_{sc}(\text{mA}/\text{cm}^2)$ | 10.37  | 10.70  | 10.58  | 10.24  | $10.47 \pm 0.21$ |
| $V_{oc}(\text{mV})$             | 677.45 | 690.23 | 684.63 | 704.63 | $689.2 \pm 11.5$ |
| FF(%)                           | 70.94  | 70.08  | 69.69  | 70.95  | $70.4 \pm 0.6$   |

| 3G-9                            | 1      | 2      | 3      | 4      | average         |
|---------------------------------|--------|--------|--------|--------|-----------------|
| $\eta(\%)$                      | 3.88   | 3.98   | 3.98   | 3.94   | $3.95 \pm 0.05$ |
| $J_{sc}(\text{mA}/\text{cm}^2)$ | 7.14   | 7.50   | 7.45   | 7.31   | $7.35 \pm 0.16$ |
| $V_{oc}(\text{mV})$             | 722.22 | 710.23 | 707.83 | 708.62 | $712.2 \pm 6.7$ |
| FF(%)                           | 75.33  | 74.72  | 75.49  | 76.10  | $75.4 \pm 0.6$  |

| 3G-10                           | 1      | 2      | 3      | 4      | average         |
|---------------------------------|--------|--------|--------|--------|-----------------|
| $\eta(\%)$                      | 4.28   | 4.11   | 4.40   | 4.30   | $4.27 \pm 0.12$ |
| $J_{sc}(\text{mA}/\text{cm}^2)$ | 8.48   | 7.90   | 8.61   | 8.40   | $8.35 \pm 0.31$ |
| $V_{oc}(\text{mV})$             | 687.04 | 691.83 | 684.63 | 683.04 | $686.6 \pm 3.8$ |
| FF(%)                           | 73.46  | 75.18  | 74.56  | 74.98  | $74.6 \pm 0.8$  |



### 3<sup>rd</sup> Generation : Cell parameters for 4 independent samples (3G-11 ~ 3G-20)

| 3G-11                           | 1      | 2      | 3      | 4      | average         |
|---------------------------------|--------|--------|--------|--------|-----------------|
| $\eta(\%)$                      | 4.05   | 4.04   | 3.95   | 4.00   | $4.01 \pm 0.05$ |
| $J_{sc}(\text{mA}/\text{cm}^2)$ | 8.02   | 8.00   | 7.82   | 7.77   | $7.90 \pm 0.13$ |
| $V_{oc}(\text{mV})$             | 676.64 | 673.45 | 675.04 | 679.05 | $676.1 \pm 2.4$ |
| FF(%)                           | 74.67  | 75.03  | 74.85  | 75.86  | $75.1 \pm 0.5$  |

| 3G-12                           | 1      | 2      | 3      | 4      | average         |
|---------------------------------|--------|--------|--------|--------|-----------------|
| $\eta(\%)$                      | 3.62   | 3.66   | 3.87   | 3.58   | $3.68 \pm 0.13$ |
| $J_{sc}(\text{mA}/\text{cm}^2)$ | 7.12   | 7.18   | 7.27   | 7.00   | $7.14 \pm 0.11$ |
| $V_{oc}(\text{mV})$             | 672.64 | 671.85 | 691.04 | 671.85 | $676.9 \pm 9.5$ |
| FF(%)                           | 75.64  | 75.94  | 77.09  | 76.01  | $76.2 \pm 0.6$  |

| 3G-13                           | 1      | 2      | 3      | 4      | average         |
|---------------------------------|--------|--------|--------|--------|-----------------|
| $\eta(\%)$                      | 3.76   | 3.73   | 3.62   | 3.35   | $3.62 \pm 0.19$ |
| $J_{sc}(\text{mA}/\text{cm}^2)$ | 6.73   | 6.67   | 6.29   | 5.77   | $6.37 \pm 0.44$ |
| $V_{oc}(\text{mV})$             | 737.41 | 730.21 | 739.01 | 740.61 | $736.8 \pm 4.6$ |
| FF(%)                           | 75.72  | 76.72  | 77.89  | 78.46  | $77.2 \pm 1.22$ |

| 3G-14                           | 1      | 2      | 3      | 4      | average         |
|---------------------------------|--------|--------|--------|--------|-----------------|
| $\eta(\%)$                      | 4.81   | 4.67   | 4.69   | 4.80   | $4.74 \pm 0.07$ |
| $J_{sc}(\text{mA}/\text{cm}^2)$ | 9.62   | 9.36   | 9.43   | 9.59   | $9.50 \pm 0.13$ |
| $V_{oc}(\text{mV})$             | 683.84 | 684.63 | 694.24 | 684.63 | $686.8 \pm 5.0$ |
| FF(%)                           | 73.10  | 72.87  | 71.71  | 73.20  | $72.7 \pm 0.7$  |

| 3G-15                           | 1      | 2      | 3      | 4      | average         |
|---------------------------------|--------|--------|--------|--------|-----------------|
| $\eta(\%)$                      | 3.99   | 3.72   | 3.78   | 4.05   | $3.89 \pm 0.16$ |
| $J_{sc}(\text{mA}/\text{cm}^2)$ | 7.33   | 6.89   | 6.91   | 7.68   | $7.20 \pm 0.38$ |
| $V_{oc}(\text{mV})$             | 716.62 | 711.83 | 716.62 | 721.42 | $716.6 \pm 3.9$ |
| FF(%)                           | 75.93  | 75.79  | 76.28  | 73.13  | $75.3 \pm 1.5$  |

| 3G-16                           | 1      | 2      | 3      | 4      | average          |
|---------------------------------|--------|--------|--------|--------|------------------|
| $\eta(\%)$                      | 3.92   | 4.05   | 4.07   | 4.04   | $4.02 \pm 0.07$  |
| $J_{sc}(\text{mA}/\text{cm}^2)$ | 8.73   | 8.52   | 8.43   | 8.16   | $8.46 \pm 0.24$  |
| $V_{oc}(\text{mV})$             | 657.45 | 679.84 | 667.05 | 677.45 | $670.5 \pm 10.3$ |
| FF(%)                           | 68.30  | 69.86  | 72.39  | 73.04  | $70.9 \pm 2.21$  |

| 3G-17                           | 1      | 2      | 3      | 4      | average          |
|---------------------------------|--------|--------|--------|--------|------------------|
| $\eta(\%)$                      | 4.71   | 4.89   | 4.64   | 4.81   | $4.76 \pm 0.11$  |
| $J_{sc}(\text{mA}/\text{cm}^2)$ | 9.91   | 9.91   | 9.88   | 10.07  | $9.94 \pm 0.09$  |
| $V_{oc}(\text{mV})$             | 655.85 | 688.64 | 674.24 | 677.45 | $674.1 \pm 13.6$ |
| FF(%)                           | 72.43  | 71.64  | 69.61  | 70.45  | $71.0 \pm 1.3$   |

| 3G-18                           | 1      | 2      | 3      | 4      | average         |
|---------------------------------|--------|--------|--------|--------|-----------------|
| $\eta(\%)$                      | 3.76   | 3.54   | 3.45   | 3.63   | $3.60 \pm 0.13$ |
| $J_{sc}(\text{mA}/\text{cm}^2)$ | 7.06   | 6.51   | 6.39   | 6.88   | $6.71 \pm 0.31$ |
| $V_{oc}(\text{mV})$             | 693.43 | 689.44 | 692.64 | 695.03 | $692.6 \pm 2.4$ |
| FF(%)                           | 76.80  | 78.80  | 77.97  | 76.05  | $77.4 \pm 1.2$  |

| 3G-19                           | 1      | 2      | 3      | 4      | average          |
|---------------------------------|--------|--------|--------|--------|------------------|
| $\eta(\%)$                      | 3.73   | 3.77   | 3.74   | 3.88   | $3.78 \pm 0.07$  |
| $J_{sc}(\text{mA}/\text{cm}^2)$ | 7.20   | 6.79   | 7.37   | 7.39   | $7.19 \pm 0.28$  |
| $V_{oc}(\text{mV})$             | 677.45 | 713.43 | 681.44 | 682.24 | $688.6 \pm 16.7$ |
| FF(%)                           | 76.54  | 77.79  | 74.54  | 76.97  | $76.5 \pm 1.4$   |

| 3G-20                           | 1      | 2      | 3      | 4      | average         |
|---------------------------------|--------|--------|--------|--------|-----------------|
| $\eta(\%)$                      | 3.86   | 3.88   | 4.06   | 3.76   | $3.89 \pm 0.12$ |
| $J_{sc}(\text{mA}/\text{cm}^2)$ | 7.17   | 7.59   | 7.69   | 7.08   | $7.38 \pm 0.30$ |
| $V_{oc}(\text{mV})$             | 714.22 | 716.62 | 720.62 | 720.62 | $718.0 \pm 3.2$ |
| FF(%)                           | 75.40  | 71.32  | 73.17  | 73.71  | $73.4 \pm 1.7$  |

### 3<sup>rd</sup> Generation : Cell parameters for 4 independent samples (3G-21 ~ 3G-30)

| 3G-21                           | 1      | 2      | 3      | 4      | average         |
|---------------------------------|--------|--------|--------|--------|-----------------|
| $\eta(\%)$                      | 3.90   | 3.79   | 3.83   | 3.81   | $3.83 \pm 0.05$ |
| $J_{sc}(\text{mA}/\text{cm}^2)$ | 7.50   | 7.25   | 7.30   | 7.52   | $7.39 \pm 0.14$ |
| $V_{oc}(\text{mV})$             | 713.43 | 702.23 | 712.62 | 710.23 | $709.6 \pm 5.1$ |
| FF(%)                           | 72.90  | 74.50  | 73.68  | 71.39  | $73.1 \pm 1.3$  |

| 3G-22                           | 1      | 2      | 3      | 4      | average         |
|---------------------------------|--------|--------|--------|--------|-----------------|
| $\eta(\%)$                      | 3.90   | 3.93   | 3.89   | 3.92   | $3.91 \pm 0.02$ |
| $J_{sc}(\text{mA}/\text{cm}^2)$ | 8.74   | 8.74   | 8.44   | 8.44   | $8.59 \pm 0.17$ |
| $V_{oc}(\text{mV})$             | 671.85 | 670.25 | 685.44 | 677.45 | $676.3 \pm 6.9$ |
| FF(%)                           | 66.41  | 67.08  | 67.36  | 68.54  | $67.4 \pm 0.9$  |

| 3G-23                           | 1      | 2      | 3      | 4      | average         |
|---------------------------------|--------|--------|--------|--------|-----------------|
| $\eta(\%)$                      | 3.74   | 3.61   | 3.73   | 3.85   | $3.73 \pm 0.10$ |
| $J_{sc}(\text{mA}/\text{cm}^2)$ | 7.52   | 7.51   | 7.46   | 7.37   | $7.47 \pm 0.07$ |
| $V_{oc}(\text{mV})$             | 699.84 | 702.23 | 697.43 | 715.02 | $703.6 \pm 7.8$ |
| FF(%)                           | 71.15  | 68.46  | 71.69  | 73.11  | $71.1 \pm 2.0$  |

| 3G-24                           | 1      | 2      | 3      | 4      | average          |
|---------------------------------|--------|--------|--------|--------|------------------|
| $\eta(\%)$                      | 2.75   | 2.95   | 2.68   | 2.77   | $2.79 \pm 0.11$  |
| $J_{sc}(\text{mA}/\text{cm}^2)$ | 5.19   | 5.56   | 5.98   | 5.08   | $5.45 \pm 0.41$  |
| $V_{oc}(\text{mV})$             | 715.02 | 716.62 | 684.63 | 734.22 | $712.6 \pm 20.6$ |
| FF(%)                           | 74.09  | 74.03  | 65.45  | 74.28  | $72.0 \pm 4.3$   |

| 3G-25                           | 1      | 2      | 3      | 4      | average          |
|---------------------------------|--------|--------|--------|--------|------------------|
| $\eta(\%)$                      | 3.92   | 4.24   | 4.21   | 4.26   | $4.16 \pm 0.16$  |
| $J_{sc}(\text{mA}/\text{cm}^2)$ | 7.77   | 8.82   | 8.99   | 9.33   | $8.73 \pm 0.67$  |
| $V_{oc}(\text{mV})$             | 701.43 | 676.64 | 681.44 | 677.45 | $684.2 \pm 11.7$ |
| FF(%)                           | 71.88  | 71.11  | 68.82  | 67.41  | $69.8 \pm 2.06$  |

| 3G-26                           | 1      | 2      | 3      | 4      | average          |
|---------------------------------|--------|--------|--------|--------|------------------|
| $\eta(\%)$                      | 3.13   | 3.12   | 3.14   | 2.89   | $3.07 \pm 0.12$  |
| $J_{sc}(\text{mA}/\text{cm}^2)$ | 6.01   | 5.99   | 5.71   | 5.53   | $5.81 \pm 0.23$  |
| $V_{oc}(\text{mV})$             | 712.62 | 710.23 | 743.00 | 722.22 | $722.0 \pm 14.9$ |
| FF(%)                           | 73.06  | 73.37  | 74.09  | 72.28  | $73.2 \pm 0.8$   |

| 3G-27                           | 1      | 2      | 3      | 4      | average          |
|---------------------------------|--------|--------|--------|--------|------------------|
| $\eta(\%)$                      | 5.46   | 5.31   | 5.43   | 5.42   | $5.41 \pm 0.07$  |
| $J_{sc}(\text{mA}/\text{cm}^2)$ | 10.94  | 10.58  | 10.94  | 10.98  | $10.86 \pm 0.19$ |
| $V_{oc}(\text{mV})$             | 678.24 | 679.84 | 674.24 | 674.24 | $676.6 \pm 2.9$  |
| FF(%)                           | 73.54  | 73.88  | 73.57  | 73.29  | $73.6 \pm 0.2$   |

| 3G-28                           | 1      | 2      | 3      | 4      | average          |
|---------------------------------|--------|--------|--------|--------|------------------|
| $\eta(\%)$                      | 3.09   | 3.03   | 2.77   | 2.73   | $2.91 \pm 0.18$  |
| $J_{sc}(\text{mA}/\text{cm}^2)$ | 6.02   | 5.82   | 5.79   | 5.71   | $5.84 \pm 0.13$  |
| $V_{oc}(\text{mV})$             | 719.01 | 713.43 | 700.63 | 697.43 | $707.6 \pm 10.3$ |
| FF(%)                           | 71.53  | 72.96  | 68.32  | 68.69  | $70.4 \pm 2.2$   |

| 3G-29                           | 1      | 2      | 3      | 4      | average         |
|---------------------------------|--------|--------|--------|--------|-----------------|
| $\eta(\%)$                      | 4.19   | 4.17   | 4.48   | 4.59   | $4.36 \pm 0.21$ |
| $J_{sc}(\text{mA}/\text{cm}^2)$ | 8.48   | 8.44   | 8.5    | 9.29   | $8.68 \pm 0.41$ |
| $V_{oc}(\text{mV})$             | 715.02 | 711.02 | 715.02 | 706.23 | $711.8 \pm 4.2$ |
| FF(%)                           | 69.09  | 69.57  | 73.78  | 70.01  | $70.6 \pm 2.1$  |

| 3G-30                           | 1      | 2      | 3      | 4      | average          |
|---------------------------------|--------|--------|--------|--------|------------------|
| $\eta(\%)$                      | 5.19   | 5.21   | 5.33   | 5.39   | $5.28 \pm 0.10$  |
| $J_{sc}(\text{mA}/\text{cm}^2)$ | 10.19  | 10.33  | 10.41  | 10.18  | $10.21 \pm 0.12$ |
| $V_{oc}(\text{mV})$             | 693.43 | 699.03 | 699.03 | 708.62 | $701.9 \pm 6.2$  |
| FF(%)                           | 74.28  | 73.6   | 74.02  | 73.39  | $73.7 \pm 0.4$   |

#### 4<sup>th</sup> Generation : Decision parameters and cell efficiencies

|       | Composition of TiO <sub>2</sub> (wt%) |    |    |    | Relative amount of dyes on TiO <sub>2</sub> |    |    |    | Relative film thickness | Pressure applied (Mpa) | η(%)        |
|-------|---------------------------------------|----|----|----|---------------------------------------------|----|----|----|-------------------------|------------------------|-------------|
|       | T1                                    | T2 | T3 | T4 | T1                                          | T2 | T3 | T4 |                         |                        |             |
| 4G-1  | 20                                    | 20 | 30 | 30 | D3                                          | D1 | D3 | D4 | F2                      | 50                     | 3.03 ± 0.15 |
| 4G-2  | 30                                    | 40 | 30 | 0  | D3                                          | D3 | D4 | D3 | F1                      | 72                     | 2.90 ± 0.06 |
| 4G-3  | 0                                     | 80 | 0  | 20 | D1                                          | D3 | D1 | D1 | F7                      | 50                     | 4.45 ± 0.09 |
| 4G-4  | 30                                    | 20 | 20 | 30 | D3                                          | D4 | D1 | D4 | F7                      | 94                     | 4.40 ± 0.03 |
| 4G-5  | 20                                    | 40 | 10 | 30 | D1                                          | D4 | D4 | D2 | F7                      | 50                     | 3.98 ± 0.17 |
| 4G-6  | 10                                    | 50 | 20 | 20 | D3                                          | D4 | D1 | D4 | F2                      | 94                     | 3.56 ± 0.11 |
| 4G-7  | 20                                    | 20 | 40 | 20 | D1                                          | D2 | D4 | D3 | F8                      | 94                     | 3.43 ± 0.11 |
| 4G-8  | 20                                    | 20 | 40 | 20 | D2                                          | D4 | D2 | D3 | F8                      | 50                     | 4.25 ± 0.04 |
| 4G-9  | 0                                     | 30 | 50 | 20 | D4                                          | D1 | D4 | D4 | F7                      | 94                     | 5.16 ± 0.02 |
| 4G-10 | 0                                     | 70 | 30 | 0  | D1                                          | D4 | D1 | D3 | F4                      | 28                     | 3.97 ± 0.09 |
| 4G-11 | 30                                    | 30 | 40 | 0  | D4                                          | D3 | D1 | D3 | F7                      | 72                     | 4.13 ± 0.11 |
| 4G-12 | 10                                    | 20 | 50 | 20 | D4                                          | D1 | D1 | D1 | F7                      | 50                     | 3.89 ± 0.12 |
| 4G-13 | 0                                     | 60 | 20 | 20 | D2                                          | D1 | D3 | D4 | F5                      | 50                     | 4.00 ± 0.10 |
| 4G-14 | 10                                    | 60 | 30 | 0  | D1                                          | D4 | D1 | D3 | F2                      | 72                     | 3.75 ± 0.09 |
| 4G-15 | 30                                    | 20 | 40 | 10 | D4                                          | D2 | D4 | D2 | F5                      | 94                     | 4.42 ± 0.19 |
| 4G-16 | 30                                    | 20 | 40 | 10 | D2                                          | D1 | D4 | D3 | F7                      | 72                     | 4.12 ± 0.09 |
| 4G-17 | 10                                    | 60 | 30 | 0  | D4                                          | D4 | D1 | D3 | F1                      | 72                     | 3.00 ± 0.12 |
| 4G-18 | 10                                    | 0  | 80 | 10 | D1                                          | D4 | D4 | D3 | F4                      | 28                     | 3.65 ± 0.10 |
| 4G-19 | 10                                    | 40 | 20 | 30 | D4                                          | D2 | D3 | D3 | F5                      | 72                     | 4.28 ± 0.04 |
| 4G-20 | 30                                    | 0  | 50 | 20 | D1                                          | D2 | D2 | D1 | F8                      | 28                     | 3.38 ± 0.05 |
| 4G-21 | 0                                     | 40 | 30 | 30 | D2                                          | D3 | D1 | D3 | F7                      | 72                     | 5.24 ± 0.05 |
| 4G-22 | 30                                    | 0  | 50 | 20 | D3                                          | D2 | D3 | D1 | F7                      | 94                     | 4.64 ± 0.05 |
| 4G-23 | 20                                    | 0  | 60 | 20 | D2                                          | D3 | D4 | D4 | F7                      | 50                     | 4.27 ± 0.11 |
| 4G-24 | 20                                    | 60 | 20 | 0  | D2                                          | D1 | D3 | D4 | F5                      | 50                     | 3.00 ± 0.05 |
| 4G-25 | 0                                     | 30 | 40 | 30 | D4                                          | D2 | D4 | D2 | F6                      | 72                     | 4.59 ± 0.15 |
| 4G-26 | 0                                     | 10 | 80 | 10 | D4                                          | D1 | D2 | D4 | F7                      | 72                     | 5.59 ± 0.04 |
| 4G-27 | 20                                    | 20 | 40 | 20 | D3                                          | D4 | D4 | D3 | F7                      | 94                     | 4.54 ± 0.03 |
| 4G-28 | 10                                    | 40 | 30 | 20 | D4                                          | D2 | D3 | D3 | F2                      | 28                     | 2.67 ± 0.13 |
| 4G-29 | 0                                     | 40 | 40 | 20 | D4                                          | D4 | D1 | D3 | F7                      | 94                     | 5.44 ± 0.04 |
| 4G-30 | 0                                     | 40 | 30 | 30 | D2                                          | D3 | D1 | D3 | F7                      | 94                     | 5.42 ± 0.11 |

(red color) the highest η used for the next generation (Elicitism)

### 4<sup>th</sup> Generation : Cell parameters for 4 independent samples (4G-1 ~ 4G-10)

| 4G-1                           | 1      | 2      | 3      | 4      | average         |
|--------------------------------|--------|--------|--------|--------|-----------------|
| $\eta$ (%)                     | 2.96   | 3.22   | 2.87   | 3.08   | $3.03 \pm 0.15$ |
| $J_{sc}$ (mA/cm <sup>2</sup> ) | 5.28   | 5.61   | 4.94   | 5.40   | $5.31 \pm 0.28$ |
| $V_{oc}$ (mV)                  | 733.41 | 725.42 | 735.81 | 726.21 | $730.2 \pm 5.2$ |
| FF(%)                          | 76.30  | 79.02  | 78.97  | 78.51  | $78.2 \pm 1.3$  |

| 4G-2                           | 1      | 2      | 3      | 4      | average         |
|--------------------------------|--------|--------|--------|--------|-----------------|
| $\eta$ (%)                     | 2.81   | 2.95   | 2.90   | 2.93   | $2.90 \pm 0.06$ |
| $J_{sc}$ (mA/cm <sup>2</sup> ) | 5.15   | 5.15   | 5.03   | 5.03   | $5.09 \pm 0.07$ |
| $V_{oc}$ (mV)                  | 747.81 | 750.20 | 754.20 | 750.20 | $750.6 \pm 2.7$ |
| FF(%)                          | 73.03  | 76.39  | 76.36  | 77.67  | $75.8 \pm 2.0$  |

| 4G-3                           | 1      | 2      | 3      | 4      | average         |
|--------------------------------|--------|--------|--------|--------|-----------------|
| $\eta$ (%)                     | 4.33   | 4.42   | 4.50   | 4.53   | $4.45 \pm 0.09$ |
| $J_{sc}$ (mA/cm <sup>2</sup> ) | 8.24   | 8.06   | 8.16   | 8.44   | $8.23 \pm 0.16$ |
| $V_{oc}$ (mV)                  | 703.03 | 707.83 | 712.62 | 703.82 | $706.8 \pm 4.4$ |
| FF(%)                          | 74.75  | 77.43  | 77.34  | 76.29  | $76.5 \pm 1.3$  |

| 4G-4                           | 1      | 2      | 3      | 4      | average         |
|--------------------------------|--------|--------|--------|--------|-----------------|
| $\eta$ (%)                     | 4.37   | 4.41   | 4.43   | 4.38   | $4.40 \pm 0.03$ |
| $J_{sc}$ (mA/cm <sup>2</sup> ) | 8.16   | 8.42   | 8.22   | 8.22   | $8.25 \pm 0.11$ |
| $V_{oc}$ (mV)                  | 698.24 | 683.84 | 697.43 | 686.23 | $691.4 \pm 7.5$ |
| FF(%)                          | 76.81  | 76.66  | 77.37  | 77.61  | $77.1 \pm 0.5$  |

| 4G-5                           | 1      | 2      | 3      | 4      | average         |
|--------------------------------|--------|--------|--------|--------|-----------------|
| $\eta$ (%)                     | 3.97   | 3.74   | 4.12   | 4.08   | $3.98 \pm 0.17$ |
| $J_{sc}$ (mA/cm <sup>2</sup> ) | 7.33   | 6.63   | 7.21   | 7.62   | $7.20 \pm 0.41$ |
| $V_{oc}$ (mV)                  | 687.84 | 702.23 | 691.04 | 694.24 | $693.8 \pm 6.2$ |
| FF(%)                          | 78.75  | 80.26  | 82.77  | 77.07  | $79.7 \pm 2.4$  |

| 4G-6                           | 1      | 2      | 3      | 4      | average         |
|--------------------------------|--------|--------|--------|--------|-----------------|
| $\eta$ (%)                     | 3.49   | 3.46   | 3.69   | 3.61   | $3.56 \pm 0.11$ |
| $J_{sc}$ (mA/cm <sup>2</sup> ) | 6.19   | 6.06   | 6.61   | 6.45   | $6.33 \pm 0.25$ |
| $V_{oc}$ (mV)                  | 736.61 | 727.81 | 739.01 | 728.62 | $733.0 \pm 5.6$ |
| FF(%)                          | 76.46  | 78.32  | 75.65  | 76.80  | $76.8 \pm 1.1$  |

| 4G-7                           | 1      | 2      | 3      | 4      | average         |
|--------------------------------|--------|--------|--------|--------|-----------------|
| $\eta$ (%)                     | 3.56   | 3.31   | 3.46   | 3.37   | $3.43 \pm 0.11$ |
| $J_{sc}$ (mA/cm <sup>2</sup> ) | 7.28   | 6.72   | 6.91   | 6.81   | $6.93 \pm 0.24$ |
| $V_{oc}$ (mV)                  | 663.05 | 665.45 | 667.05 | 666.25 | $665.5 \pm 1.7$ |
| FF(%)                          | 73.84  | 74.06  | 75.13  | 74.27  | $74.3 \pm 0.6$  |

| 4G-8                           | 1      | 2      | 3      | 4      | average         |
|--------------------------------|--------|--------|--------|--------|-----------------|
| $\eta$ (%)                     | 4.20   | 4.27   | 4.27   | 4.25   | $4.25 \pm 0.04$ |
| $J_{sc}$ (mA/cm <sup>2</sup> ) | 8.33   | 8.61   | 8.61   | 8.43   | $8.49 \pm 0.14$ |
| $V_{oc}$ (mV)                  | 671.04 | 663.86 | 663.86 | 683.84 | $670.7 \pm 9.4$ |
| FF(%)                          | 75.06  | 74.74  | 74.74  | 73.76  | $74.6 \pm 0.6$  |

| 4G-9                           | 1      | 2      | 3      | 4      | average         |
|--------------------------------|--------|--------|--------|--------|-----------------|
| $\eta$ (%)                     | 5.17   | 5.16   | 5.13   | 5.18   | $5.16 \pm 0.02$ |
| $J_{sc}$ (mA/cm <sup>2</sup> ) | 10.09  | 9.86   | 9.83   | 9.87   | $9.91 \pm 0.12$ |
| $V_{oc}$ (mV)                  | 674.24 | 683.04 | 690.23 | 688.64 | $684.0 \pm 7.2$ |
| FF(%)                          | 76.05  | 76.62  | 75.58  | 76.19  | $76.1 \pm 0.4$  |

| 4G-10                          | 1      | 2      | 3      | 4      | average          |
|--------------------------------|--------|--------|--------|--------|------------------|
| $\eta$ (%)                     | 3.94   | 3.85   | 4.05   | 4.03   | $3.97 \pm 0.09$  |
| $J_{sc}$ (mA/cm <sup>2</sup> ) | 7.07   | 6.89   | 7.30   | 7.24   | $7.13 \pm 0.19$  |
| $V_{oc}$ (mV)                  | 713.43 | 711.83 | 731.81 | 729.41 | $721.6 \pm 10.5$ |
| FF(%)                          | 78.18  | 78.54  | 75.80  | 76.24  | $77.2 \pm 1.4$   |

### 4<sup>th</sup> Generation : Cell parameters for 4 independent samples (4G-11 ~ 4G-20)

| 4G-11                          | 1      | 2      | 3      | 4      | average          |
|--------------------------------|--------|--------|--------|--------|------------------|
| $\eta$ (%)                     | 4.02   | 4.28   | 4.12   | 4.10   | $4.13 \pm 0.11$  |
| $J_{sc}$ (mA/cm <sup>2</sup> ) | 7.27   | 8.39   | 7.64   | 8.19   | $7.87 \pm 0.51$  |
| $V_{oc}$ (mV)                  | 717.42 | 690.23 | 701.43 | 694.24 | $700.8 \pm 12.0$ |
| FF(%)                          | 77.09  | 73.86  | 76.96  | 72.19  | $75.0 \pm 2.4$   |

| 4G-12                          | 1      | 2      | 3      | 4      | average         |
|--------------------------------|--------|--------|--------|--------|-----------------|
| $\eta$ (%)                     | 3.91   | 3.86   | 4.04   | 3.76   | $3.89 \pm 0.12$ |
| $J_{sc}$ (mA/cm <sup>2</sup> ) | 7.24   | 7.22   | 7.68   | 6.99   | $7.28 \pm 0.29$ |
| $V_{oc}$ (mV)                  | 700.63 | 695.03 | 693.43 | 701.43 | $697.6 \pm 4.0$ |
| FF(%)                          | 77.03  | 76.97  | 75.98  | 76.57  | $76.6 \pm 0.5$  |

| 4G-13                          | 1      | 2      | 3      | 4      | average         |
|--------------------------------|--------|--------|--------|--------|-----------------|
| $\eta$ (%)                     | 3.87   | 4.09   | 3.99   | 4.06   | $4.00 \pm 0.10$ |
| $J_{sc}$ (mA/cm <sup>2</sup> ) | 7.47   | 7.58   | 7.37   | 7.53   | $7.49 \pm 0.09$ |
| $V_{oc}$ (mV)                  | 713.43 | 727.02 | 718.22 | 723.82 | $720.6 \pm 6.0$ |
| FF(%)                          | 72.68  | 74.20  | 75.34  | 74.46  | $74.2 \pm 1.1$  |

| 4G-14                          | 1      | 2      | 3      | 4      | average         |
|--------------------------------|--------|--------|--------|--------|-----------------|
| $\eta$ (%)                     | 3.67   | 3.77   | 3.87   | 3.70   | $3.75 \pm 0.09$ |
| $J_{sc}$ (mA/cm <sup>2</sup> ) | 6.49   | 6.64   | 6.91   | 6.56   | $6.65 \pm 0.18$ |
| $V_{oc}$ (mV)                  | 724.61 | 736.61 | 721.42 | 730.21 | $728.2 \pm 6.7$ |
| FF(%)                          | 78.03  | 76.97  | 77.70  | 77.20  | $77.5 \pm 0.5$  |

| 4G-15                          | 1      | 2      | 3      | 4      | average         |
|--------------------------------|--------|--------|--------|--------|-----------------|
| $\eta$ (%)                     | 4.55   | 4.36   | 4.19   | 4.60   | $4.42 \pm 0.19$ |
| $J_{sc}$ (mA/cm <sup>2</sup> ) | 8.54   | 8.06   | 7.81   | 8.64   | $8.26 \pm 0.40$ |
| $V_{oc}$ (mV)                  | 695.83 | 702.23 | 709.42 | 707.02 | $703.6 \pm 6.0$ |
| FF(%)                          | 76.51  | 77.08  | 75.58  | 75.20  | $76.1 \pm 0.9$  |

| 4G-16                          | 1      | 2      | 3      | 4      | average         |
|--------------------------------|--------|--------|--------|--------|-----------------|
| $\eta$ (%)                     | 4.15   | 4.04   | 4.05   | 4.23   | $4.12 \pm 0.09$ |
| $J_{sc}$ (mA/cm <sup>2</sup> ) | 8.06   | 7.75   | 7.68   | 8.20   | $7.92 \pm 0.25$ |
| $V_{oc}$ (mV)                  | 685.44 | 690.23 | 689.44 | 671.85 | $684.2 \pm 8.5$ |
| FF(%)                          | 75.21  | 75.55  | 76.39  | 76.87  | $76.0 \pm 0.8$  |

| 4G-17                          | 1      | 2      | 3      | 4      | average         |
|--------------------------------|--------|--------|--------|--------|-----------------|
| $\eta$ (%)                     | 3.09   | 3.10   | 2.94   | 2.86   | $3.00 \pm 0.12$ |
| $J_{sc}$ (mA/cm <sup>2</sup> ) | 5.39   | 5.34   | 5.15   | 4.88   | $5.19 \pm 0.23$ |
| $V_{oc}$ (mV)                  | 746.21 | 751.00 | 750.20 | 748.60 | $749.0 \pm 2.1$ |
| FF(%)                          | 76.79  | 77.32  | 76.18  | 78.20  | $77.12 \pm 0.9$ |

| 4G-18                          | 1      | 2      | 3      | 4      | average         |
|--------------------------------|--------|--------|--------|--------|-----------------|
| $\eta$ (%)                     | 3.77   | 3.53   | 3.63   | 3.66   | $3.65 \pm 0.10$ |
| $J_{sc}$ (mA/cm <sup>2</sup> ) | 6.91   | 6.95   | 6.73   | 6.78   | $6.85 \pm 0.11$ |
| $V_{oc}$ (mV)                  | 701.43 | 699.84 | 701.43 | 701.43 | $701.0 \pm 0.8$ |
| FF(%)                          | 77.79  | 72.56  | 76.88  | 76.96  | $76.1 \pm 2.4$  |

| 4G-19                          | 1      | 2      | 3      | 4      | average         |
|--------------------------------|--------|--------|--------|--------|-----------------|
| $\eta$ (%)                     | 4.30   | 4.28   | 4.30   | 4.23   | $4.29 \pm 0.04$ |
| $J_{sc}$ (mA/cm <sup>2</sup> ) | 7.66   | 7.56   | 7.78   | 7.53   | $7.63 \pm 0.11$ |
| $V_{oc}$ (mV)                  | 723.02 | 720.62 | 722.22 | 727.02 | $723.2 \pm 2.7$ |
| FF(%)                          | 77.67  | 78.49  | 76.59  | 77.23  | $77.5 \pm 0.8$  |

| 4G-20                          | 1      | 2      | 3      | 4      | average         |
|--------------------------------|--------|--------|--------|--------|-----------------|
| $\eta$ (%)                     | 3.31   | 3.38   | 3.42   | 3.40   | $3.38 \pm 0.05$ |
| $J_{sc}$ (mA/cm <sup>2</sup> ) | 6.26   | 6.29   | 6.56   | 6.58   | $6.42 \pm 0.17$ |
| $V_{oc}$ (mV)                  | 687.84 | 684.63 | 677.45 | 683.84 | $683.4 \pm 4.4$ |
| FF(%)                          | 77.00  | 78.52  | 77.02  | 75.52  | $77.0 \pm 1.2$  |

### 4<sup>th</sup> Generation : Cell parameters for 4 independent samples (4G-21 ~ 4G-30)

| 4G-21                           | 1      | 2      | 3      | 4      | average         |
|---------------------------------|--------|--------|--------|--------|-----------------|
| $\eta(\%)$                      | 5.24   | 5.21   | 5.31   | 5.21   | $5.24 \pm 0.05$ |
| $J_{sc}(\text{mA}/\text{cm}^2)$ | 9.67   | 9.60   | 9.72   | 9.82   | $9.70 \pm 0.09$ |
| $V_{oc}(\text{mV})$             | 703.82 | 715.02 | 713.43 | 705.42 | $709.4 \pm 5.6$ |
| FF(%)                           | 77.00  | 75.91  | 76.56  | 75.19  | $76.2 \pm 0.8$  |

| 4G-22                           | 1      | 2      | 3      | 4      | average         |
|---------------------------------|--------|--------|--------|--------|-----------------|
| $\eta(\%)$                      | 4.61   | 4.70   | 4.64   | 4.59   | $4.64 \pm 0.05$ |
| $J_{sc}(\text{mA}/\text{cm}^2)$ | 8.81   | 8.82   | 8.99   | 8.63   | $8.81 \pm 0.15$ |
| $V_{oc}(\text{mV})$             | 698.24 | 701.43 | 706.23 | 697.43 | $700.8 \pm 0.4$ |
| FF(%)                           | 74.93  | 75.97  | 73.14  | 76.31  | $75.1 \pm 1.4$  |

| 4G-23                           | 1      | 2      | 3      | 4      | average         |
|---------------------------------|--------|--------|--------|--------|-----------------|
| $\eta(\%)$                      | 4.12   | 4.26   | 4.32   | 4.37   | $4.27 \pm 0.11$ |
| $J_{sc}(\text{mA}/\text{cm}^2)$ | 7.92   | 7.91   | 7.79   | 8.03   | $7.91 \pm 0.10$ |
| $V_{oc}(\text{mV})$             | 693.43 | 697.43 | 703.82 | 710.23 | $701.2 \pm 7.4$ |
| FF(%)                           | 75.10  | 77.31  | 78.75  | 76.61  | $76.9 \pm 1.5$  |

| 4G-24                           | 1      | 2      | 3      | 4      | average         |
|---------------------------------|--------|--------|--------|--------|-----------------|
| $\eta(\%)$                      | 3.02   | 2.95   | 2.97   | 3.06   | $3.00 \pm 0.05$ |
| $J_{sc}(\text{mA}/\text{cm}^2)$ | 5.60   | 5.05   | 5.05   | 5.29   | $5.25 \pm 0.26$ |
| $V_{oc}(\text{mV})$             | 694.24 | 709.42 | 708.62 | 706.23 | $704.6 \pm 7.1$ |
| FF(%)                           | 77.51  | 82.21  | 83.20  | 81.98  | $81.2 \pm 2.5$  |

| 4G-25                           | 1      | 2      | 3      | 4      | average         |
|---------------------------------|--------|--------|--------|--------|-----------------|
| $\eta(\%)$                      | 4.42   | 4.62   | 4.53   | 4.77   | $4.59 \pm 0.15$ |
| $J_{sc}(\text{mA}/\text{cm}^2)$ | 8.44   | 9.05   | 8.65   | 9.08   | $8.81 \pm 0.31$ |
| $V_{oc}(\text{mV})$             | 689.44 | 691.04 | 696.63 | 695.83 | $693.2 \pm 3.5$ |
| FF(%)                           | 75.91  | 73.87  | 75.20  | 75.54  | $75.1 \pm 0.9$  |

| 4G-26                           | 1      | 2      | 3      | 4      | average          |
|---------------------------------|--------|--------|--------|--------|------------------|
| $\eta(\%)$                      | 5.59   | 5.63   | 5.62   | 5.54   | $5.59 \pm 0.04$  |
| $J_{sc}(\text{mA}/\text{cm}^2)$ | 10.36  | 10.41  | 10.30  | 10.12  | $10.30 \pm 0.13$ |
| $V_{oc}(\text{mV})$             | 706.23 | 710.23 | 717.42 | 715.02 | $712.2 \pm 5.0$  |
| FF(%)                           | 76.32  | 76.09  | 76.05  | 76.57  | $76.3 \pm 0.2$   |

| 4G-27                           | 1      | 2      | 3      | 4      | average         |
|---------------------------------|--------|--------|--------|--------|-----------------|
| $\eta(\%)$                      | 4.50   | 4.55   | 4.56   | 4.56   | $4.54 \pm 0.03$ |
| $J_{sc}(\text{mA}/\text{cm}^2)$ | 8.27   | 8.47   | 8.70   | 8.46   | $8.47 \pm 0.17$ |
| $V_{oc}(\text{mV})$             | 705.42 | 698.24 | 703.03 | 701.43 | $702.0 \pm 3.0$ |
| FF(%)                           | 77.20  | 76.96  | 74.60  | 76.78  | $76.4 \pm 1.2$  |

| 4G-28                           | 1      | 2      | 3      | 4      | average         |
|---------------------------------|--------|--------|--------|--------|-----------------|
| $\eta(\%)$                      | 2.66   | 2.78   | 2.50   | 2.75   | $2.67 \pm 0.13$ |
| $J_{sc}(\text{mA}/\text{cm}^2)$ | 4.71   | 4.77   | 4.40   | 4.96   | $4.71 \pm 0.23$ |
| $V_{oc}(\text{mV})$             | 743.00 | 742.21 | 740.61 | 747.00 | $743.2 \pm 2.7$ |
| FF(%)                           | 76.13  | 78.54  | 76.66  | 74.23  | $76.4 \pm 1.8$  |

| 4G-29                           | 1      | 2      | 3      | 4      | average          |
|---------------------------------|--------|--------|--------|--------|------------------|
| $\eta(\%)$                      | 5.45   | 5.40   | 5.42   | 5.48   | $5.44 \pm 0.04$  |
| $J_{sc}(\text{mA}/\text{cm}^2)$ | 10.28  | 10.38  | 10.30  | 10.09  | $10.26 \pm 0.12$ |
| $V_{oc}(\text{mV})$             | 702.23 | 696.63 | 701.43 | 711.83 | $703.0 \pm 6.4$  |
| FF(%)                           | 75.47  | 74.69  | 75.00  | 76.29  | $75.4 \pm 0.7$   |

| 4G-30                           | 1      | 2      | 3      | 4      | average          |
|---------------------------------|--------|--------|--------|--------|------------------|
| $\eta(\%)$                      | 5.29   | 5.37   | 5.52   | 5.51   | $5.42 \pm 0.11$  |
| $J_{sc}(\text{mA}/\text{cm}^2)$ | 10.09  | 9.99   | 10.17  | 10.14  | $10.10 \pm 0.08$ |
| $V_{oc}(\text{mV})$             | 706.23 | 710.23 | 721.42 | 717.42 | $713.8 \pm 6.9$  |
| FF(%)                           | 74.24  | 75.72  | 75.31  | 75.69  | $75.2 \pm 0.7$   |

### 5<sup>th</sup> Generation : Decision parameters and cell efficiencies

|       | Composition of TiO <sub>2</sub> (wt%) |    |    |    | Relative amount of dyes on TiO <sub>2</sub> |    |    |    | Relative film thickness | Pressure applied (Mpa) | η(%)        |
|-------|---------------------------------------|----|----|----|---------------------------------------------|----|----|----|-------------------------|------------------------|-------------|
|       | T1                                    | T2 | T3 | T4 | T1                                          | T2 | T3 | T4 |                         |                        |             |
| 5G-1  | 20                                    | 20 | 40 | 20 | D2                                          | D4 | D2 | D3 | F7                      | 50                     | 4.86 ± 0.06 |
| 5G-2  | 20                                    | 40 | 10 | 30 | D2                                          | D4 | D2 | D2 | F8                      | 50                     | 3.77 ± 0.04 |
| 5G-3  | 30                                    | 20 | 20 | 30 | D2                                          | D4 | D1 | D4 | F7                      | 94                     | 4.20 ± 0.04 |
| 5G-4  | 0                                     | 40 | 40 | 20 | D4                                          | D4 | D1 | D2 | F7                      | 94                     | 4.83 ± 0.06 |
| 5G-5  | 10                                    | 0  | 90 | 0  | D1                                          | D3 | D3 | D1 | F7                      | 94                     | 5.07 ± 0.05 |
| 5G-6  | 20                                    | 40 | 20 | 20 | D1                                          | D1 | D2 | D4 | F5                      | 50                     | 3.22 ± 0.14 |
| 5G-7  | 0                                     | 90 | 0  | 10 | D4                                          | D1 | D3 | D1 | F5                      | 50                     | 2.58 ± 0.13 |
| 5G-8  | 20                                    | 20 | 40 | 20 | D3                                          | D4 | D4 | D3 | F8                      | 94                     | 3.96 ± 0.15 |
| 5G-9  | 0                                     | 10 | 80 | 10 | D4                                          | D1 | D2 | D4 | F7                      | 94                     | 5.84 ± 0.02 |
| 5G-10 | 0                                     | 20 | 80 | 0  | D4                                          | D1 | D2 | D4 | F7                      | 94                     | 4.69 ± 0.02 |
| 5G-11 | 0                                     | 0  | 90 | 10 | D4                                          | D1 | D2 | D3 | F7                      | 94                     | 5.36 ± 0.12 |
| 5G-12 | 10                                    | 40 | 20 | 30 | D1                                          | D4 | D1 | D4 | F7                      | 94                     | 4.65 ± 0.10 |
| 5G-13 | 10                                    | 20 | 50 | 20 | D4                                          | D2 | D1 | D1 | F7                      | 50                     | 4.24 ± 0.07 |
| 5G-14 | 0                                     | 40 | 30 | 30 | D4                                          | D4 | D1 | D3 | F5                      | 94                     | 4.17 ± 0.04 |
| 5G-15 | 20                                    | 40 | 40 | 0  | D3                                          | D1 | D4 | D4 | F5                      | 94                     | 3.42 ± 0.09 |
| 5G-16 | 20                                    | 40 | 10 | 30 | D2                                          | D3 | D1 | D2 | F7                      | 50                     | 3.94 ± 0.14 |
| 5G-17 | 0                                     | 50 | 40 | 10 | D3                                          | D3 | D2 | D1 | F5                      | 28                     | 3.21 ± 0.08 |
| 5G-18 | 0                                     | 30 | 70 | 0  | D3                                          | D3 | D3 | D1 | F3                      | 28                     | 4.22 ± 0.16 |
| 5G-19 | 0                                     | 80 | 0  | 20 | D4                                          | D4 | D1 | D1 | F7                      | 50                     | 4.43 ± 0.14 |
| 5G-20 | 10                                    | 20 | 50 | 20 | D4                                          | D1 | D4 | D4 | F7                      | 94                     | 4.69 ± 0.06 |
| 5G-21 | 30                                    | 10 | 40 | 20 | D2                                          | D1 | D4 | D3 | F7                      | 50                     | 3.78 ± 0.09 |
| 5G-22 | 30                                    | 40 | 10 | 20 | D1                                          | D4 | D4 | D2 | F7                      | 72                     | 3.45 ± 0.09 |
| 5G-23 | 20                                    | 20 | 50 | 10 | D2                                          | D4 | D1 | D4 | F3                      | 28                     | 3.03 ± 0.03 |
| 5G-24 | 0                                     | 20 | 50 | 30 | D2                                          | D2 | D1 | D4 | F2                      | 28                     | 3.02 ± 0.07 |
| 5G-25 | 0                                     | 40 | 30 | 30 | D4                                          | D2 | D3 | D3 | F7                      | 94                     | 4.28 ± 0.09 |
| 5G-26 | 10                                    | 40 | 20 | 30 | D2                                          | D3 | D1 | D3 | F5                      | 72                     | 4.05 ± 0.05 |
| 5G-27 | 0                                     | 60 | 10 | 30 | D2                                          | D4 | D2 | D2 | F7                      | 94                     | 5.04 ± 0.11 |
| 5G-28 | 10                                    | 20 | 50 | 20 | D4                                          | D1 | D4 | D4 | F7                      | 50                     | 4.80 ± 0.07 |
| 5G-29 | 0                                     | 30 | 40 | 30 | D4                                          | D3 | D1 | D3 | F2                      | 50                     | 3.84 ± 0.15 |
| 5G-30 | 0                                     | 10 | 80 | 10 | D4                                          | D1 | D2 | D4 | F7                      | 72                     | 5.52 ± 0.06 |

(red color) the highest η used for the next generation (Elicitism)

### 5<sup>th</sup> Generation : Cell parameters for 4 independent samples (5G-1 ~ 5G-10)

| 5G-1                           | 1      | 2      | 3      | 4      | average     |
|--------------------------------|--------|--------|--------|--------|-------------|
| $\eta$ (%)                     | 4.85   | 4.82   | 4.83   | 4.94   | 4.86 ± 0.06 |
| $J_{sc}$ (mA/cm <sup>2</sup> ) | 9.28   | 9.00   | 9.05   | 9.58   | 9.23 ± 0.26 |
| $V_{oc}$ (mV)                  | 699.03 | 701.43 | 699.84 | 689.44 | 697.4 ± 5.4 |
| FF(%)                          | 74.77  | 76.37  | 76.17  | 74.83  | 75.5 ± 0.9  |

| 5G-2                           | 1      | 2      | 3      | 4      | average      |
|--------------------------------|--------|--------|--------|--------|--------------|
| $\eta$ (%)                     | 3.81   | 3.79   | 3.71   | 3.78   | 3.77 ± 0.04  |
| $J_{sc}$ (mA/cm <sup>2</sup> ) | 7.42   | 6.89   | 7.18   | 7.39   | 7.22 ± 0.24  |
| $V_{oc}$ (mV)                  | 676.64 | 711.83 | 670.25 | 678.24 | 684.2 ± 18.7 |
| FF(%)                          | 75.90  | 77.30  | 77.04  | 75.34  | 76.4 ± 0.9   |

| 5G-3                           | 1      | 2      | 3      | 4      | average     |
|--------------------------------|--------|--------|--------|--------|-------------|
| $\eta$ (%)                     | 4.14   | 4.20   | 4.20   | 4.24   | 4.20 ± 0.04 |
| $J_{sc}$ (mA/cm <sup>2</sup> ) | 7.69   | 8.15   | 8.05   | 7.98   | 7.97 ± 0.19 |
| $V_{oc}$ (mV)                  | 708.62 | 695.83 | 698.24 | 707.02 | 702.4 ± 6.3 |
| FF(%)                          | 75.92  | 74.10  | 74.79  | 75.09  | 75.0 ± 0.8  |

| 5G-4                           | 1      | 2      | 3      | 4      | average      |
|--------------------------------|--------|--------|--------|--------|--------------|
| $\eta$ (%)                     | 4.86   | 4.79   | 4.79   | 4.91   | 4.83 ± 0.06  |
| $J_{sc}$ (mA/cm <sup>2</sup> ) | 9.63   | 9.15   | 9.21   | 9.90   | 9.47 ± 0.36  |
| $V_{oc}$ (mV)                  | 689.44 | 696.63 | 721.42 | 687.04 | 698.6 ± 15.7 |
| FF(%)                          | 73.12  | 75.05  | 72.08  | 72.15  | 73.1 ± 1.4   |

| 5G-5                           | 1      | 2      | 3      | 4      | average      |
|--------------------------------|--------|--------|--------|--------|--------------|
| $\eta$ (%)                     | 5.03   | 5.04   | 5.13   | 5.09   | 5.07 ± 0.05  |
| $J_{sc}$ (mA/cm <sup>2</sup> ) | 10.31  | 10.42  | 10.62  | 10.35  | 10.42 ± 0.14 |
| $V_{oc}$ (mV)                  | 683.04 | 687.04 | 681.44 | 688.64 | 685.0 ± 3.4  |
| FF(%)                          | 71.34  | 70.39  | 70.86  | 71.39  | 71.0 ± 0.5   |

| 5G-6                           | 1      | 2      | 3      | 4      | average     |
|--------------------------------|--------|--------|--------|--------|-------------|
| $\eta$ (%)                     | 3.31   | 3.37   | 3.12   | 3.09   | 3.22 ± 0.14 |
| $J_{sc}$ (mA/cm <sup>2</sup> ) | 5.65   | 5.92   | 5.47   | 5.46   | 5.62 ± 0.22 |
| $V_{oc}$ (mV)                  | 727.81 | 726.21 | 716.62 | 717.42 | 722.0 ± 5.8 |
| FF(%)                          | 80.34  | 78.51  | 79.75  | 78.97  | 79.4 ± 0.8  |

| 5G-7                           | 1      | 2      | 3      | 4      | average      |
|--------------------------------|--------|--------|--------|--------|--------------|
| $\eta$ (%)                     | 2.61   | 2.46   | 2.76   | 2.49   | 2.58 ± 0.13  |
| $J_{sc}$ (mA/cm <sup>2</sup> ) | 4.49   | 4.34   | 5.00   | 4.35   | 4.55 ± 0.31  |
| $V_{oc}$ (mV)                  | 706.23 | 691.83 | 679.84 | 704.63 | 685.6 ± 12.3 |
| FF(%)                          | 82.24  | 82.03  | 81.07  | 81.32  | 81.7 ± 0.6   |

| 5G-8                           | 1      | 2      | 3      | 4      | average     |
|--------------------------------|--------|--------|--------|--------|-------------|
| $\eta$ (%)                     | 4.16   | 3.91   | 3.99   | 3.81   | 3.96 ± 0.15 |
| $J_{sc}$ (mA/cm <sup>2</sup> ) | 8.65   | 7.96   | 8.49   | 7.89   | 8.25 ± 0.38 |
| $V_{oc}$ (mV)                  | 675.04 | 674.24 | 675.85 | 679.84 | 676.2 ± 2.5 |
| FF(%)                          | 71.22  | 72.73  | 69.49  | 70.99  | 71.1 ± 1.3  |

| 5G-9                           | 1      | 2      | 3      | 4      | average      |
|--------------------------------|--------|--------|--------|--------|--------------|
| $\eta$ (%)                     | 5.92   | 5.92   | 5.95   | 5.96   | 5.94 ± 0.02  |
| $J_{sc}$ (mA/cm <sup>2</sup> ) | 11.68  | 11.94  | 11.13  | 11.67  | 11.61 ± 0.34 |
| $V_{oc}$ (mV)                  | 708.62 | 710.23 | 719.01 | 716.62 | 713.6 ± 5.0  |
| FF(%)                          | 71.52  | 69.76  | 74.31  | 71.26  | 71.7 ± 1.9   |

| 5G-10                          | 1      | 2      | 3      | 4      | average     |
|--------------------------------|--------|--------|--------|--------|-------------|
| $\eta$ (%)                     | 4.66   | 4.72   | 4.69   | 4.70   | 4.69 ± 0.02 |
| $J_{sc}$ (mA/cm <sup>2</sup> ) | 9.60   | 9.30   | 8.91   | 9.06   | 9.22 ± 0.30 |
| $V_{oc}$ (mV)                  | 696.63 | 711.02 | 716.62 | 702.23 | 706.6 ± 8.9 |
| FF(%)                          | 69.73  | 71.44  | 73.37  | 73.87  | 72.1 ± 1.9  |



### 5<sup>th</sup> Generation : Cell parameters for 4 independent samples (5G-11 ~ 5G-20)

| 5G-11                          | 1      | 2      | 3      | 4      | average          |
|--------------------------------|--------|--------|--------|--------|------------------|
| $\eta$ (%)                     | 5.53   | 5.25   | 5.32   | 5.35   | $5.36 \pm 0.12$  |
| $J_{sc}$ (mA/cm <sup>2</sup> ) | 10.99  | 10.81  | 10.76  | 10.00  | $10.64 \pm 0.44$ |
| $V_{oc}$ (mV)                  | 706.23 | 703.82 | 704.63 | 723.82 | $709.6 \pm 9.5$  |
| FF(%)                          | 71.29  | 68.96  | 70.14  | 73.95  | $71.1 \pm 2.1$   |

| 5G-12                          | 1      | 2      | 3      | 4      | average         |
|--------------------------------|--------|--------|--------|--------|-----------------|
| $\eta$ (%)                     | 4.68   | 4.50   | 4.67   | 4.73   | $4.65 \pm 0.10$ |
| $J_{sc}$ (mA/cm <sup>2</sup> ) | 8.86   | 8.44   | 8.89   | 9.13   | $8.83 \pm 0.29$ |
| $V_{oc}$ (mV)                  | 704.63 | 705.42 | 710.23 | 707.02 | $706.8 \pm 2.5$ |
| FF(%)                          | 74.99  | 75.52  | 74.01  | 73.28  | $74.5 \pm 1.0$  |

| 5G-13                          | 1      | 2      | 3      | 4      | average         |
|--------------------------------|--------|--------|--------|--------|-----------------|
| $\eta$ (%)                     | 4.20   | 4.22   | 4.22   | 4.34   | $4.24 \pm 0.07$ |
| $J_{sc}$ (mA/cm <sup>2</sup> ) | 7.89   | 8.23   | 8.28   | 8.45   | $8.21 \pm 0.23$ |
| $V_{oc}$ (mV)                  | 693.43 | 690.23 | 695.83 | 691.83 | $692.8 \pm 2.4$ |
| FF(%)                          | 76.71  | 74.29  | 73.19  | 74.32  | $74.6 \pm 1.5$  |

| 5G-14                          | 1      | 2      | 3      | 4      | average         |
|--------------------------------|--------|--------|--------|--------|-----------------|
| $\eta$ (%)                     | 4.22   | 4.17   | 4.18   | 4.13   | $4.17 \pm 0.04$ |
| $J_{sc}$ (mA/cm <sup>2</sup> ) | 7.56   | 7.46   | 7.82   | 7.63   | $7.62 \pm 0.15$ |
| $V_{oc}$ (mV)                  | 739.80 | 730.21 | 733.41 | 744.61 | $737.0 \pm 6.5$ |
| FF(%)                          | 75.44  | 76.49  | 72.86  | 72.63  | $74.4 \pm 1.9$  |

| 5G-15                          | 1      | 2      | 3      | 4      | average         |
|--------------------------------|--------|--------|--------|--------|-----------------|
| $\eta$ (%)                     | 3.31   | 3.39   | 3.51   | 3.46   | $3.42 \pm 0.09$ |
| $J_{sc}$ (mA/cm <sup>2</sup> ) | 5.96   | 6.06   | 6.20   | 6.19   | $6.10 \pm 0.11$ |
| $V_{oc}$ (mV)                  | 723.02 | 711.02 | 722.22 | 722.22 | $719.6 \pm 5.8$ |
| FF(%)                          | 76.65  | 78.61  | 78.39  | 77.43  | $77.8 \pm 0.9$  |

| 5G-16                          | 1      | 2      | 3      | 4      | average         |
|--------------------------------|--------|--------|--------|--------|-----------------|
| $\eta$ (%)                     | 4.01   | 3.98   | 4.03   | 3.74   | $3.94 \pm 0.14$ |
| $J_{sc}$ (mA/cm <sup>2</sup> ) | 7.33   | 7.30   | 7.64   | 7.12   | $7.35 \pm 0.22$ |
| $V_{oc}$ (mV)                  | 709.42 | 703.03 | 696.63 | 705.42 | $703.6 \pm 5.4$ |
| FF(%)                          | 77.22  | 77.56  | 75.79  | 74.50  | $76.3 \pm 1.4$  |

| 5G-17                          | 1      | 2      | 3      | 4      | average         |
|--------------------------------|--------|--------|--------|--------|-----------------|
| $\eta$ (%)                     | 3.12   | 3.20   | 3.32   | 3.22   | $3.21 \pm 0.08$ |
| $J_{sc}$ (mA/cm <sup>2</sup> ) | 5.34   | 5.68   | 5.67   | 5.49   | $5.54 \pm 0.16$ |
| $V_{oc}$ (mV)                  | 743.81 | 758.99 | 746.21 | 744.61 | $748.4 \pm 7.1$ |
| FF(%)                          | 78.40  | 74.23  | 78.46  | 78.72  | $77.5 \pm 2.2$  |

| 5G-18                          | 1      | 2      | 3      | 4      | average         |
|--------------------------------|--------|--------|--------|--------|-----------------|
| $\eta$ (%)                     | 4.36   | 4.08   | 4.36   | 4.09   | $4.22 \pm 0.16$ |
| $J_{sc}$ (mA/cm <sup>2</sup> ) | 7.81   | 7.30   | 7.85   | 7.05   | $7.51 \pm 0.39$ |
| $V_{oc}$ (mV)                  | 747.00 | 760.59 | 758.20 | 765.39 | $757.8 \pm 7.8$ |
| FF(%)                          | 74.67  | 73.52  | 73.25  | 75.86  | $74.3 \pm 1.2$  |

| 5G-19                          | 1      | 2      | 3      | 4      | average          |
|--------------------------------|--------|--------|--------|--------|------------------|
| $\eta$ (%)                     | 4.37   | 4.57   | 4.51   | 4.26   | $4.43 \pm 0.14$  |
| $J_{sc}$ (mA/cm <sup>2</sup> ) | 7.91   | 8.16   | 7.74   | 7.83   | $7.91 \pm 0.18$  |
| $V_{oc}$ (mV)                  | 715.82 | 732.62 | 752.60 | 719.01 | $730.0 \pm 16.7$ |
| FF(%)                          | 77.15  | 76.47  | 77.40  | 75.65  | $76.7 \pm 0.8$   |

| 5G-20                          | 1      | 2      | 3      | 4      | average         |
|--------------------------------|--------|--------|--------|--------|-----------------|
| $\eta$ (%)                     | 4.71   | 4.76   | 4.61   | 4.69   | $4.69 \pm 0.06$ |
| $J_{sc}$ (mA/cm <sup>2</sup> ) | 9.15   | 9.17   | 8.61   | 9.13   | $9.01 \pm 0.27$ |
| $V_{oc}$ (mV)                  | 715.02 | 710.23 | 719.82 | 717.42 | $715.6 \pm 4.1$ |
| FF(%)                          | 72.02  | 73.05  | 74.40  | 71.67  | $72.8 \pm 1.2$  |

### 5<sup>th</sup> Generation : Cell parameters for 4 independent samples (5G-21 ~ 5G-30)

| 5G-21                          | 1      | 2      | 3      | 4      | average         |
|--------------------------------|--------|--------|--------|--------|-----------------|
| $\eta$ (%)                     | 3.73   | 3.91   | 3.71   | 3.78   | $3.78 \pm 0.09$ |
| $J_{sc}$ (mA/cm <sup>2</sup> ) | 6.92   | 7.46   | 6.78   | 6.82   | $7.00 \pm 0.32$ |
| $V_{oc}$ (mV)                  | 696.63 | 692.64 | 703.03 | 714.22 | $701.6 \pm 9.4$ |
| FF(%)                          | 77.42  | 75.69  | 77.76  | 77.60  | $77.1 \pm 1.0$  |

| 5G-22                          | 1      | 2      | 3      | 4      | average          |
|--------------------------------|--------|--------|--------|--------|------------------|
| $\eta$ (%)                     | 3.54   | 3.50   | 3.44   | 3.34   | $3.45 \pm 0.09$  |
| $J_{sc}$ (mA/cm <sup>2</sup> ) | 6.51   | 7.45   | 6.26   | 6.12   | $6.58 \pm 0.60$  |
| $V_{oc}$ (mV)                  | 695.83 | 679.05 | 706.23 | 695.83 | $694.2 \pm 11.3$ |
| FF(%)                          | 78.17  | 69.24  | 77.86  | 78.37  | $75.9 \pm 4.5$   |

| 5G-23                          | 1      | 2      | 3      | 4      | average         |
|--------------------------------|--------|--------|--------|--------|-----------------|
| $\eta$ (%)                     | 3.06   | 3.04   | 3.00   | 3.03   | $3.03 \pm 0.03$ |
| $J_{sc}$ (mA/cm <sup>2</sup> ) | 5.28   | 5.13   | 5.18   | 5.23   | $5.20 \pm 0.06$ |
| $V_{oc}$ (mV)                  | 745.40 | 743.81 | 752.60 | 746.21 | $747.0 \pm 3.9$ |
| FF(%)                          | 77.78  | 79.73  | 76.93  | 77.48  | $78.0 \pm 1.2$  |

| 5G-24                          | 1      | 2      | 3      | 4      | average         |
|--------------------------------|--------|--------|--------|--------|-----------------|
| $\eta$ (%)                     | 3.07   | 2.95   | 3.09   | 2.98   | $3.02 \pm 0.07$ |
| $J_{sc}$ (mA/cm <sup>2</sup> ) | 5.08   | 4.94   | 5.14   | 5.01   | $5.04 \pm 0.09$ |
| $V_{oc}$ (mV)                  | 769.39 | 762.19 | 774.99 | 764.59 | $767.8 \pm 5.7$ |
| FF(%)                          | 78.47  | 78.47  | 77.47  | 77.74  | $78.0 \pm 0.5$  |

| 5G-25                          | 1      | 2      | 3      | 4      | average         |
|--------------------------------|--------|--------|--------|--------|-----------------|
| $\eta$ (%)                     | 4.41   | 4.23   | 4.24   | 4.22   | $4.28 \pm 0.09$ |
| $J_{sc}$ (mA/cm <sup>2</sup> ) | 8.33   | 8.13   | 8.11   | 8.13   | $8.17 \pm 0.11$ |
| $V_{oc}$ (mV)                  | 708.62 | 712.62 | 714.22 | 721.42 | $714.2 \pm 5.4$ |
| FF(%)                          | 74.76  | 72.97  | 73.23  | 72.04  | $73.3 \pm 1.1$  |

| 5G-26                          | 1      | 2      | 3      | 4      | average         |
|--------------------------------|--------|--------|--------|--------|-----------------|
| $\eta$ (%)                     | 4.05   | 4.10   | 3.98   | 4.07   | $4.05 \pm 0.05$ |
| $J_{sc}$ (mA/cm <sup>2</sup> ) | 7.31   | 7.27   | 7.30   | 7.23   | $7.28 \pm 0.04$ |
| $V_{oc}$ (mV)                  | 729.41 | 739.80 | 735.81 | 732.62 | $734.4 \pm 4.4$ |
| FF(%)                          | 76.00  | 76.18  | 74.10  | 76.81  | $75.8 \pm 1.2$  |

| 5G-27                          | 1      | 2      | 3      | 4      | average         |
|--------------------------------|--------|--------|--------|--------|-----------------|
| $\eta$ (%)                     | 5.00   | 5.00   | 4.95   | 5.19   | $5.04 \pm 0.11$ |
| $J_{sc}$ (mA/cm <sup>2</sup> ) | 9.69   | 9.86   | 9.58   | 9.54   | $9.67 \pm 0.14$ |
| $V_{oc}$ (mV)                  | 714.22 | 707.02 | 709.42 | 723.82 | $713.6 \pm 7.4$ |
| FF(%)                          | 72.29  | 71.69  | 72.79  | 75.23  | $73.0 \pm 1.6$  |

| 5G-28                          | 1      | 2      | 3      | 4      | average         |
|--------------------------------|--------|--------|--------|--------|-----------------|
| $\eta$ (%)                     | 4.79   | 4.81   | 4.89   | 4.72   | $4.80 \pm 0.07$ |
| $J_{sc}$ (mA/cm <sup>2</sup> ) | 9.61   | 9.12   | 9.03   | 9.11   | $9.22 \pm 0.27$ |
| $V_{oc}$ (mV)                  | 708.62 | 712.62 | 711.83 | 711.02 | $711.0 \pm 1.7$ |
| FF(%)                          | 70.31  | 74.01  | 76.05  | 72.87  | $73.3 \pm 2.4$  |

| 5G-29                          | 1      | 2      | 3      | 4      | average         |
|--------------------------------|--------|--------|--------|--------|-----------------|
| $\eta$ (%)                     | 3.97   | 3.67   | 3.75   | 3.97   | $3.84 \pm 0.15$ |
| $J_{sc}$ (mA/cm <sup>2</sup> ) | 6.95   | 6.37   | 6.45   | 6.83   | $6.65 \pm 0.28$ |
| $V_{oc}$ (mV)                  | 760.59 | 762.19 | 762.19 | 764.59 | $762.4 \pm 1.7$ |
| FF(%)                          | 75.11  | 75.58  | 76.26  | 76.14  | $75.8 \pm 0.5$  |

| 5G-30                          | 1      | 2      | 3      | 4      | average          |
|--------------------------------|--------|--------|--------|--------|------------------|
| $\eta$ (%)                     | 5.53   | 5.46   | 5.60   | 5.48   | $5.52 \pm 0.06$  |
| $J_{sc}$ (mA/cm <sup>2</sup> ) | 10.73  | 10.63  | 10.25  | 10.42  | $10.51 \pm 0.21$ |
| $V_{oc}$ (mV)                  | 716.62 | 714.22 | 719.82 | 725.42 | $719.0 \pm 4.8$  |
| FF(%)                          | 71.88  | 72.01  | 75.90  | 72.45  | $73.1 \pm 1.9$   |

### 6<sup>th</sup> Generation : Decision parameters and cell efficiencies

|       | Composition of TiO <sub>2</sub> (wt%) |    |     |    | Relative amount of dyes on TiO <sub>2</sub> |    |    |    | Relative film thickness | Pressure applied (Mpa) | η(%)        |
|-------|---------------------------------------|----|-----|----|---------------------------------------------|----|----|----|-------------------------|------------------------|-------------|
|       | T1                                    | T2 | T3  | T4 | T1                                          | T2 | T3 | T4 |                         |                        |             |
| 6G-1  | 20                                    | 40 | 40  | 0  | D3                                          | D1 | D4 | D4 | F6                      | 94                     | 3.37 ± 0.11 |
| 6G-2  | 0                                     | 40 | 40  | 20 | D4                                          | D3 | D2 | D3 | F7                      | 94                     | 4.91 ± 0.10 |
| 6G-3  | 0                                     | 40 | 40  | 20 | D4                                          | D4 | D3 | D4 | F7                      | 94                     | 5.35 ± 0.06 |
| 6G-4  | 20                                    | 20 | 60  | 0  | D3                                          | D1 | D4 | D2 | F3                      | 28                     | 2.84 ± 0.13 |
| 6G-5  | 0                                     | 20 | 50  | 30 | D2                                          | D2 | D1 | D4 | F7                      | 94                     | 4.50 ± 0.13 |
| 6G-6  | 0                                     | 0  | 90  | 10 | D4                                          | D1 | D2 | D3 | F2                      | 28                     | 3.75 ± 0.18 |
| 6G-7  | 10                                    | 40 | 20  | 30 | D3                                          | D4 | D1 | D4 | F7                      | 94                     | 4.97 ± 0.06 |
| 6G-8  | 20                                    | 40 | 20  | 20 | D3                                          | D3 | D2 | D4 | F5                      | 50                     | 3.53 ± 0.07 |
| 6G-9  | 0                                     | 40 | 40  | 20 | D4                                          | D1 | D1 | D2 | F7                      | 94                     | 3.80 ± 0.05 |
| 6G-10 | 0                                     | 10 | 80  | 10 | D4                                          | D4 | D2 | D4 | F7                      | 94                     | 5.63 ± 0.04 |
| 6G-11 | 0                                     | 10 | 80  | 10 | D4                                          | D2 | D2 | D4 | F7                      | 94                     | 5.67 ± 0.08 |
| 6G-12 | 0                                     | 20 | 80  | 0  | D4                                          | D1 | D2 | D4 | F7                      | 94                     | 5.53 ± 0.15 |
| 6G-13 | 10                                    | 20 | 50  | 20 | D2                                          | D4 | D1 | D4 | F7                      | 94                     | 4.48 ± 0.09 |
| 6G-14 | 0                                     | 0  | 100 | 0  | D4                                          | D2 | D2 | D4 | F7                      | 94                     | 4.93 ± 0.04 |
| 6G-15 | 10                                    | 20 | 50  | 20 | D4                                          | D1 | D3 | D2 | F7                      | 94                     | 4.37 ± 0.08 |
| 6G-16 | 0                                     | 20 | 80  | 0  | D4                                          | D1 | D3 | D4 | F7                      | 94                     | 4.44 ± 0.19 |
| 6G-17 | 20                                    | 50 | 30  | 0  | D2                                          | D2 | D2 | D1 | F6                      | 94                     | 3.62 ± 0.07 |
| 6G-18 | 30                                    | 70 | 0   | 0  | D1                                          | D4 | D1 | D2 | F6                      | 72                     | 3.09 ± 0.15 |
| 6G-19 | 10                                    | 10 | 70  | 10 | D1                                          | D2 | D3 | D4 | F7                      | 94                     | 4.54 ± 0.04 |
| 6G-20 | 0                                     | 60 | 10  | 30 | D2                                          | D3 | D1 | D2 | F7                      | 94                     | 4.44 ± 0.16 |
| 6G-21 | 0                                     | 30 | 50  | 20 | D4                                          | D1 | D2 | D4 | F7                      | 94                     | 5.02 ± 0.09 |
| 6G-22 | 10                                    | 0  | 90  | 0  | D1                                          | D3 | D3 | D1 | F4                      | 72                     | 4.11 ± 0.05 |
| 6G-23 | 0                                     | 30 | 40  | 30 | D4                                          | D1 | D1 | D3 | F2                      | 50                     | 3.08 ± 0.14 |
| 6G-24 | 10                                    | 50 | 20  | 20 | D4                                          | D2 | D4 | D1 | F6                      | 28                     | 3.41 ± 0.20 |
| 6G-25 | 30                                    | 40 | 10  | 20 | D2                                          | D4 | D2 | D2 | F8                      | 94                     | 3.15 ± 0.08 |
| 6G-26 | 0                                     | 0  | 80  | 20 | D4                                          | D1 | D2 | D4 | F8                      | 50                     | 5.08 ± 0.05 |
| 6G-27 | 0                                     | 30 | 50  | 20 | D2                                          | D2 | D1 | D4 | F7                      | 94                     | 4.40 ± 0.10 |
| 6G-28 | 20                                    | 40 | 10  | 30 | D2                                          | D4 | D2 | D2 | F7                      | 50                     | 4.03 ± 0.08 |
| 6G-29 | 10                                    | 0  | 90  | 0  | D4                                          | D1 | D2 | D4 | F7                      | 72                     | 5.34 ± 0.05 |
| 6G-30 | 0                                     | 10 | 80  | 10 | D4                                          | D1 | D2 | D4 | F7                      | 94                     | 5.91 ± 0.06 |

(red color) the highest η used for the next generation (Elicitism)

### 6<sup>th</sup> Generation : Cell parameters for 4 independent samples (6G-1 ~ 6G-10)

| 6G-1                           | 1      | 2      | 3      | 4      | average         |
|--------------------------------|--------|--------|--------|--------|-----------------|
| $\eta$ (%)                     | 3.46   | 3.34   | 3.45   | 3.23   | $3.37 \pm 0.11$ |
| $J_{sc}$ (mA/cm <sup>2</sup> ) | 6.69   | 6.56   | 6.63   | 6.22   | $6.52 \pm 0.21$ |
| $V_{oc}$ (mV)                  | 696.63 | 693.43 | 698.24 | 691.04 | $694.8 \pm 3.2$ |
| FF(%)                          | 74.37  | 73.53  | 74.59  | 75.17  | $74.4 \pm 0.7$  |

| 6G-2                           | 1      | 2      | 3      | 4      | average         |
|--------------------------------|--------|--------|--------|--------|-----------------|
| $\eta$ (%)                     | 4.96   | 4.85   | 5.02   | 4.81   | $4.91 \pm 0.10$ |
| $J_{sc}$ (mA/cm <sup>2</sup> ) | 9.08   | 8.77   | 9.11   | 8.85   | $8.95 \pm 0.16$ |
| $V_{oc}$ (mV)                  | 720.62 | 727.81 | 723.02 | 721.42 | $723.2 \pm 3.2$ |
| FF(%)                          | 75.88  | 75.99  | 76.27  | 75.28  | $75.9 \pm 0.4$  |

| 6G-3                           | 1      | 2      | 3      | 4      | average          |
|--------------------------------|--------|--------|--------|--------|------------------|
| $\eta$ (%)                     | 5.35   | 5.41   | 5.27   | 5.35   | $5.35 \pm 0.06$  |
| $J_{sc}$ (mA/cm <sup>2</sup> ) | 10.47  | 10.51  | 9.97   | 9.92   | $10.21 \pm 0.31$ |
| $V_{oc}$ (mV)                  | 699.03 | 699.84 | 716.62 | 723.02 | $709.6 \pm 12.1$ |
| FF(%)                          | 73.18  | 73.60  | 73.80  | 74.58  | $73.8 \pm 0.6$   |

| 6G-4                           | 1      | 2      | 3      | 4      | average         |
|--------------------------------|--------|--------|--------|--------|-----------------|
| $\eta$ (%)                     | 2.88   | 2.90   | 2.99   | 2.69   | $2.84 \pm 0.13$ |
| $J_{sc}$ (mA/cm <sup>2</sup> ) | 5.07   | 5.18   | 5.27   | 4.64   | $5.04 \pm 0.3$  |
| $V_{oc}$ (mV)                  | 725.42 | 736.61 | 734.22 | 739.01 | $733.8 \pm 5.9$ |
| FF(%)                          | 78.29  | 76.07  | 77.35  | 78.46  | $77.5 \pm 1.1$  |

| 6G-5                           | 1      | 2      | 3      | 4      | average         |
|--------------------------------|--------|--------|--------|--------|-----------------|
| $\eta$ (%)                     | 4.38   | 4.68   | 4.41   | 4.51   | $4.50 \pm 0.13$ |
| $J_{sc}$ (mA/cm <sup>2</sup> ) | 8.47   | 8.78   | 8.61   | 8.43   | $8.57 \pm 0.16$ |
| $V_{oc}$ (mV)                  | 707.83 | 709.42 | 702.23 | 710.23 | $707.4 \pm 3.6$ |
| FF(%)                          | 73.15  | 75.15  | 72.99  | 75.34  | $74.2 \pm 1.3$  |

| 6G-6                           | 1      | 2      | 3      | 4      | average         |
|--------------------------------|--------|--------|--------|--------|-----------------|
| $\eta$ (%)                     | 3.83   | 3.80   | 3.49   | 3.87   | $3.75 \pm 0.18$ |
| $J_{sc}$ (mA/cm <sup>2</sup> ) | 6.55   | 6.55   | 5.90   | 6.44   | $6.36 \pm 0.31$ |
| $V_{oc}$ (mV)                  | 770.19 | 772.59 | 770.99 | 780.59 | $773.6 \pm 4.8$ |
| FF(%)                          | 75.90  | 75.17  | 76.67  | 77.09  | $76.2 \pm 0.9$  |

| 6G-7                           | 1      | 2      | 3      | 4      | average         |
|--------------------------------|--------|--------|--------|--------|-----------------|
| $\eta$ (%)                     | 4.95   | 5.04   | 4.96   | 4.91   | $4.97 \pm 0.06$ |
| $J_{sc}$ (mA/cm <sup>2</sup> ) | 9.23   | 9.35   | 9.30   | 9.17   | $9.26 \pm 0.08$ |
| $V_{oc}$ (mV)                  | 703.03 | 709.42 | 700.63 | 715.82 | $707.2 \pm 6.8$ |
| FF(%)                          | 76.35  | 76.04  | 76.19  | 74.86  | $75.9 \pm 0.7$  |

| 6G-8                           | 1      | 2      | 3      | 4      | average         |
|--------------------------------|--------|--------|--------|--------|-----------------|
| $\eta$ (%)                     | 3.49   | 3.47   | 3.62   | 3.55   | $3.53 \pm 0.07$ |
| $J_{sc}$ (mA/cm <sup>2</sup> ) | 6.18   | 6.15   | 6.87   | 6.42   | $6.41 \pm 0.33$ |
| $V_{oc}$ (mV)                  | 742.21 | 741.40 | 725.42 | 733.41 | $735.6 \pm 7.9$ |
| FF(%)                          | 76.06  | 76.01  | 72.73  | 75.40  | $75.1 \pm 1.6$  |

| 6G-9                           | 1      | 2      | 3      | 4      | average         |
|--------------------------------|--------|--------|--------|--------|-----------------|
| $\eta$ (%)                     | 3.83   | 3.85   | 3.81   | 3.72   | $3.80 \pm 0.05$ |
| $J_{sc}$ (mA/cm <sup>2</sup> ) | 7.29   | 7.28   | 7.36   | 7.02   | $7.24 \pm 0.15$ |
| $V_{oc}$ (mV)                  | 688.64 | 693.43 | 683.04 | 691.04 | $689.0 \pm 4.5$ |
| FF(%)                          | 76.19  | 76.18  | 75.81  | 76.77  | $76.2 \pm 0.4$  |

| 6G-10                          | 1      | 2      | 3      | 4      | average          |
|--------------------------------|--------|--------|--------|--------|------------------|
| $\eta$ (%)                     | 5.68   | 5.60   | 5.60   | 5.63   | $5.63 \pm 0.04$  |
| $J_{sc}$ (mA/cm <sup>2</sup> ) | 10.89  | 10.39  | 10.17  | 10.21  | $10.41 \pm 0.33$ |
| $V_{oc}$ (mV)                  | 713.43 | 722.22 | 737.41 | 734.22 | $726.8 \pm 11.1$ |
| FF(%)                          | 73.11  | 74.61  | 74.73  | 75.10  | $74.4 \pm 0.9$   |

### 6<sup>th</sup> Generation : Cell parameters for 4 independent samples (6G-11 ~ 6G-20)

| 6G-11                           | 1      | 2      | 3      | 4      | average          |
|---------------------------------|--------|--------|--------|--------|------------------|
| $\eta(\%)$                      | 5.70   | 5.70   | 5.72   | 5.55   | $5.67 \pm 0.08$  |
| $J_{sc}(\text{mA}/\text{cm}^2)$ | 10.74  | 10.71  | 10.47  | 9.87   | $10.45 \pm 0.40$ |
| $V_{oc}(\text{mV})$             | 711.83 | 718.22 | 723.02 | 734.22 | $721.8 \pm 9.5$  |
| FF(%)                           | 74.58  | 74.10  | 75.55  | 76.52  | $75.2 \pm 1.1$   |

| 6G-12                           | 1      | 2      | 3      | 4      | average          |
|---------------------------------|--------|--------|--------|--------|------------------|
| $\eta(\%)$                      | 5.42   | 5.50   | 5.74   | 5.44   | $5.53 \pm 0.15$  |
| $J_{sc}(\text{mA}/\text{cm}^2)$ | 10.42  | 10.63  | 11.06  | 10.88  | $10.75 \pm 0.28$ |
| $V_{oc}(\text{mV})$             | 695.03 | 690.23 | 697.43 | 684.63 | $691.8 \pm 5.7$  |
| FF(%)                           | 74.88  | 74.93  | 74.44  | 73.06  | $74.3 \pm 0.9$   |

| 6G-13                           | 1      | 2      | 3      | 4      | average         |
|---------------------------------|--------|--------|--------|--------|-----------------|
| $\eta(\%)$                      | 4.37   | 4.44   | 4.58   | 4.51   | $4.48 \pm 0.09$ |
| $J_{sc}(\text{mA}/\text{cm}^2)$ | 8.00   | 8.27   | 8.50   | 8.29   | $8.26 \pm 0.21$ |
| $V_{oc}(\text{mV})$             | 714.22 | 706.23 | 710.23 | 709.42 | $710.0 \pm 3.3$ |
| FF(%)                           | 76.43  | 76.06  | 75.89  | 76.75  | $76.3 \pm 0.4$  |

| 6G-14                           | 1      | 2      | 3      | 4      | average         |
|---------------------------------|--------|--------|--------|--------|-----------------|
| $\eta(\%)$                      | 4.91   | 4.87   | 4.92   | 4.88   | $4.90 \pm 0.02$ |
| $J_{sc}(\text{mA}/\text{cm}^2)$ | 8.98   | 8.95   | 9.04   | 8.85   | $8.96 \pm 0.08$ |
| $V_{oc}(\text{mV})$             | 728.62 | 730.21 | 731.81 | 727.02 | $729.4 \pm 2.1$ |
| FF(%)                           | 75.47  | 74.91  | 74.76  | 74.74  | $75.0 \pm 0.3$  |

| 6G-15                           | 1      | 2      | 3      | 4      | average         |
|---------------------------------|--------|--------|--------|--------|-----------------|
| $\eta(\%)$                      | 4.43   | 4.32   | 4.44   | 4.30   | $4.37 \pm 0.08$ |
| $J_{sc}(\text{mA}/\text{cm}^2)$ | 8.03   | 8.50   | 8.17   | 7.93   | $8.16 \pm 0.25$ |
| $V_{oc}(\text{mV})$             | 711.83 | 707.02 | 711.83 | 716.62 | $711.8 \pm 3.9$ |
| FF(%)                           | 77.52  | 71.87  | 76.41  | 75.56  | $75.3 \pm 2.5$  |

| 6G-16                           | 1      | 2      | 3      | 4      | average         |
|---------------------------------|--------|--------|--------|--------|-----------------|
| $\eta(\%)$                      | 4.32   | 4.73   | 4.40   | 4.32   | $4.44 \pm 0.19$ |
| $J_{sc}(\text{mA}/\text{cm}^2)$ | 8.00   | 8.56   | 8.68   | 8.11   | $8.34 \pm 0.33$ |
| $V_{oc}(\text{mV})$             | 713.43 | 725.42 | 704.63 | 709.42 | $713.2 \pm 8.9$ |
| FF(%)                           | 75.77  | 76.13  | 72.04  | 75.02  | $74.7 \pm 1.9$  |

| 6G-17                           | 1      | 2      | 3      | 4      | average         |
|---------------------------------|--------|--------|--------|--------|-----------------|
| $\eta(\%)$                      | 3.67   | 3.54   | 3.68   | 3.58   | $3.62 \pm 0.07$ |
| $J_{sc}(\text{mA}/\text{cm}^2)$ | 6.78   | 6.80   | 7.41   | 6.63   | $6.90 \pm 0.35$ |
| $V_{oc}(\text{mV})$             | 699.03 | 689.44 | 682.24 | 703.03 | $693.4 \pm 9.4$ |
| FF(%)                           | 77.51  | 75.46  | 72.68  | 76.76  | $75.6 \pm 2.1$  |

| 6G-18                           | 1      | 2      | 3      | 4      | average         |
|---------------------------------|--------|--------|--------|--------|-----------------|
| $\eta(\%)$                      | 3.18   | 3.19   | 3.13   | 2.87   | $3.09 \pm 0.15$ |
| $J_{sc}(\text{mA}/\text{cm}^2)$ | 5.92   | 5.87   | 5.78   | 5.26   | $5.71 \pm 0.30$ |
| $V_{oc}(\text{mV})$             | 695.83 | 695.83 | 699.84 | 703.03 | $698.6 \pm 3.5$ |
| FF(%)                           | 77.29  | 78.08  | 77.55  | 77.60  | $77.6 \pm 0.3$  |

| 6G-19                           | 1      | 2      | 3      | 4      | average         |
|---------------------------------|--------|--------|--------|--------|-----------------|
| $\eta(\%)$                      | 4.59   | 4.53   | 4.56   | 4.49   | $4.54 \pm 0.04$ |
| $J_{sc}(\text{mA}/\text{cm}^2)$ | 8.64   | 8.30   | 8.82   | 8.38   | $8.54 \pm 0.24$ |
| $V_{oc}(\text{mV})$             | 700.63 | 711.83 | 694.24 | 706.23 | $703.2 \pm 7.5$ |
| FF(%)                           | 75.81  | 76.64  | 74.42  | 75.95  | $75.7 \pm 0.9$  |

| 6G-20                           | 1      | 2      | 3      | 4      | average         |
|---------------------------------|--------|--------|--------|--------|-----------------|
| $\eta(\%)$                      | 4.22   | 4.54   | 4.43   | 4.59   | $4.44 \pm 0.16$ |
| $J_{sc}(\text{mA}/\text{cm}^2)$ | 7.63   | 8.23   | 7.98   | 8.28   | $8.03 \pm 0.30$ |
| $V_{oc}(\text{mV})$             | 723.02 | 717.42 | 723.82 | 720.62 | $721.2 \pm 2.9$ |
| FF(%)                           | 76.52  | 76.81  | 76.64  | 76.83  | $76.7 \pm 0.2$  |

### 6<sup>th</sup> Generation : Cell parameters for 4 independent samples (6G-21 ~ 6G-30)

| 6G-21                          | 1      | 2      | 3      | 4      | average          |
|--------------------------------|--------|--------|--------|--------|------------------|
| $\eta$ (%)                     | 5.14   | 4.93   | 5.00   | 5.02   | $5.02 \pm 0.09$  |
| $J_{sc}$ (mA/cm <sup>2</sup> ) | 9.88   | 9.92   | 9.80   | 10.40  | $10.00 \pm 0.27$ |
| $V_{oc}$ (mV)                  | 703.03 | 698.24 | 709.42 | 678.24 | $697.2 \pm 13.5$ |
| FF(%)                          | 74.09  | 71.14  | 71.88  | 71.14  | $72.1 \pm 1.4$   |

| 6G-22                          | 1      | 2      | 3      | 4      | average         |
|--------------------------------|--------|--------|--------|--------|-----------------|
| $\eta$ (%)                     | 4.11   | 4.03   | 4.14   | 4.15   | $4.11 \pm 0.05$ |
| $J_{sc}$ (mA/cm <sup>2</sup> ) | 8.28   | 7.24   | 7.34   | 7.62   | $7.62 \pm 0.47$ |
| $V_{oc}$ (mV)                  | 721.42 | 720.62 | 720.62 | 716.62 | $719.8 \pm 2.2$ |
| FF(%)                          | 68.78  | 77.36  | 78.26  | 76.08  | $75.1 \pm 4.3$  |

| 6G-23                          | 1      | 2      | 3      | 4      | average         |
|--------------------------------|--------|--------|--------|--------|-----------------|
| $\eta$ (%)                     | 3.17   | 2.88   | 3.17   | 3.10   | $3.08 \pm 0.14$ |
| $J_{sc}$ (mA/cm <sup>2</sup> ) | 5.70   | 5.11   | 5.82   | 5.59   | $5.56 \pm 0.31$ |
| $V_{oc}$ (mV)                  | 724.61 | 723.02 | 723.02 | 728.62 | $724.8 \pm 2.6$ |
| FF(%)                          | 76.78  | 77.96  | 75.43  | 76.03  | $76.6 \pm 1.1$  |

| 6G-24                          | 1      | 2      | 3      | 4      | average         |
|--------------------------------|--------|--------|--------|--------|-----------------|
| $\eta$ (%)                     | 3.26   | 3.47   | 3.67   | 3.23   | $3.41 \pm 0.20$ |
| $J_{sc}$ (mA/cm <sup>2</sup> ) | 5.98   | 6.49   | 6.73   | 5.95   | $6.29 \pm 0.39$ |
| $V_{oc}$ (mV)                  | 706.23 | 703.03 | 710.23 | 707.02 | $706.6 \pm 3.0$ |
| FF(%)                          | 77.28  | 76.00  | 76.88  | 76.92  | $76.8 \pm 0.5$  |

| 6G-25                          | 1      | 2      | 3      | 4      | average         |
|--------------------------------|--------|--------|--------|--------|-----------------|
| $\eta$ (%)                     | 3.12   | 3.17   | 3.06   | 3.25   | $3.15 \pm 0.08$ |
| $J_{sc}$ (mA/cm <sup>2</sup> ) | 6.14   | 6.13   | 5.92   | 6.50   | $6.17 \pm 0.24$ |
| $V_{oc}$ (mV)                  | 679.84 | 683.84 | 684.63 | 673.45 | $680.4 \pm 5.1$ |
| FF(%)                          | 74.68  | 75.70  | 75.60  | 74.20  | $75.1 \pm 0.7$  |

| 6G-26                          | 1      | 2      | 3      | 4      | average          |
|--------------------------------|--------|--------|--------|--------|------------------|
| $\eta$ (%)                     | 5.10   | 5.01   | 5.11   | 5.09   | $5.08 \pm 0.05$  |
| $J_{sc}$ (mA/cm <sup>2</sup> ) | 9.15   | 9.88   | 9.85   | 9.15   | $9.51 \pm 0.42$  |
| $V_{oc}$ (mV)                  | 729.41 | 683.84 | 700.63 | 727.81 | $710.4 \pm 22.1$ |
| FF(%)                          | 76.50  | 74.19  | 74.07  | 76.40  | $75.3 \pm 1.3$   |

| 6G-27                          | 1      | 2      | 3      | 4      | average         |
|--------------------------------|--------|--------|--------|--------|-----------------|
| $\eta$ (%)                     | 4.34   | 4.55   | 4.34   | 4.38   | $4.40 \pm 0.10$ |
| $J_{sc}$ (mA/cm <sup>2</sup> ) | 8.25   | 8.82   | 8.54   | 8.18   | $8.45 \pm 0.29$ |
| $V_{oc}$ (mV)                  | 693.43 | 692.64 | 683.84 | 704.63 | $693.6 \pm 8.5$ |
| FF(%)                          | 75.81  | 74.50  | 74.31  | 75.91  | $75.1 \pm 0.9$  |

| 6G-28                          | 1      | 2      | 3      | 4      | average         |
|--------------------------------|--------|--------|--------|--------|-----------------|
| $\eta$ (%)                     | 4.10   | 4.09   | 3.99   | 3.93   | $4.03 \pm 0.08$ |
| $J_{sc}$ (mA/cm <sup>2</sup> ) | 7.61   | 7.44   | 7.42   | 7.17   | $7.41 \pm 0.18$ |
| $V_{oc}$ (mV)                  | 686.23 | 699.84 | 701.43 | 699.03 | $696.6 \pm 7.0$ |
| FF(%)                          | 78.47  | 78.52  | 76.68  | 78.47  | $78.0 \pm 0.9$  |

| 6G-29                          | 1      | 2      | 3      | 4      | average         |
|--------------------------------|--------|--------|--------|--------|-----------------|
| $\eta$ (%)                     | 5.41   | 5.31   | 5.32   | 5.32   | $5.34 \pm 0.05$ |
| $J_{sc}$ (mA/cm <sup>2</sup> ) | 9.63   | 9.64   | 9.66   | 9.62   | $9.64 \pm 0.01$ |
| $V_{oc}$ (mV)                  | 735.81 | 723.82 | 724.61 | 727.02 | $727.8 \pm 5.5$ |
| FF(%)                          | 76.33  | 76.11  | 76.04  | 76.07  | $76.1 \pm 0.1$  |

| 6G-30                          | 1     | 2      | 3      | 4      | average          |
|--------------------------------|-------|--------|--------|--------|------------------|
| $\eta$ (%)                     | 5.88  | 5.93   | 5.92   | 5.9    | $5.91 \pm 0.02$  |
| $J_{sc}$ (mA/cm <sup>2</sup> ) | 11.35 | 11.79  | 11.72  | 11.64  | $11.63 \pm 0.19$ |
| $V_{oc}$ (mV)                  | 714.2 | 719.01 | 721.42 | 719.82 | $718.6 \pm 3.1$  |
| FF(%)                          | 72.54 | 69.97  | 70.03  | 70.43  | $70.7 \pm 1.2$   |

### 7<sup>th</sup> Generation : Decision parameters and cell efficiencies

|              | Composition of TiO <sub>2</sub> (wt%) |     |     |    | Relative amount of dyes on TiO <sub>2</sub> |    |    |    | Relative film thickness | Pressure applied (Mpa) | η(%)        |
|--------------|---------------------------------------|-----|-----|----|---------------------------------------------|----|----|----|-------------------------|------------------------|-------------|
|              | T1                                    | T2  | T3  | T4 | T1                                          | T2 | T3 | T4 |                         |                        |             |
| <b>7G-1</b>  | 0                                     | 60  | 10  | 30 | D2                                          | D4 | D1 | D2 | F7                      | 94                     | 5.00 ± 0.13 |
| <b>7G-2</b>  | 10                                    | 20  | 50  | 20 | D2                                          | D3 | D1 | D4 | F7                      | 94                     | 4.97 ± 0.03 |
| <b>7G-3</b>  | 20                                    | 20  | 40  | 20 | D1                                          | D2 | D4 | D3 | F7                      | 94                     | 4.35 ± 0.09 |
| <b>7G-4</b>  | 0                                     | 20  | 50  | 30 | D2                                          | D2 | D1 | D4 | F8                      | 94                     | 4.80 ± 0.07 |
| <b>7G-5</b>  | 20                                    | 40  | 20  | 20 | D4                                          | D1 | D2 | D4 | F5                      | 50                     | 4.05 ± 0.11 |
| <b>7G-6</b>  | 10                                    | 20  | 50  | 20 | D3                                          | D3 | D3 | D2 | F7                      | 94                     | 4.86 ± 0.12 |
| <b>7G-7</b>  | 30                                    | 60  | 10  | 0  | D2                                          | D3 | D1 | D2 | F8                      | 50                     | 3.54 ± 0.11 |
| <b>7G-8</b>  | 10                                    | 10  | 80  | 0  | D4                                          | D1 | D2 | D4 | F7                      | 94                     | 5.35 ± 0.09 |
| <b>7G-9</b>  | 0                                     | 50  | 20  | 30 | D3                                          | D2 | D4 | D2 | F8                      | 72                     | 4.12 ± 0.08 |
| <b>7G-10</b> | 20                                    | 40  | 10  | 30 | D1                                          | D4 | D1 | D2 | F7                      | 50                     | 4.15 ± 0.09 |
| <b>7G-11</b> | 10                                    | 0   | 80  | 10 | D2                                          | D4 | D4 | D1 | F3                      | 50                     | 3.69 ± 0.09 |
| <b>7G-12</b> | 0                                     | 0   | 80  | 20 | D4                                          | D1 | D2 | D4 | F7                      | 94                     | 5.72 ± 0.04 |
| <b>7G-13</b> | 10                                    | 0   | 90  | 0  | D4                                          | D1 | D2 | D4 | F3                      | 72                     | 4.37 ± 0.09 |
| <b>7G-14</b> | 20                                    | 20  | 60  | 0  | D3                                          | D1 | D4 | D2 | F7                      | 28                     | 4.26 ± 0.10 |
| <b>7G-15</b> | 10                                    | 10  | 70  | 10 | D2                                          | D2 | D2 | D3 | F7                      | 94                     | 5.12 ± 0.05 |
| <b>7G-16</b> | 10                                    | 0   | 80  | 10 | D4                                          | D1 | D2 | D4 | F7                      | 94                     | 5.26 ± 0.05 |
| <b>7G-17</b> | 0                                     | 10  | 80  | 10 | D3                                          | D3 | D2 | D4 | F7                      | 94                     | 5.40 ± 0.09 |
| <b>7G-18</b> | 0                                     | 30  | 40  | 30 | D4                                          | D1 | D2 | D4 | F8                      | 50                     | 3.93 ± 0.04 |
| <b>7G-19</b> | 0                                     | 20  | 80  | 0  | D3                                          | D1 | D4 | D2 | F7                      | 94                     | 4.84 ± 0.08 |
| <b>7G-20</b> | 20                                    | 20  | 60  | 0  | D4                                          | D1 | D3 | D4 | F3                      | 28                     | 3.91 ± 0.09 |
| <b>7G-21</b> | 0                                     | 40  | 40  | 20 | D4                                          | D1 | D1 | D2 | F6                      | 94                     | 4.02 ± 0.11 |
| <b>7G-22</b> | 20                                    | 50  | 30  | 0  | D2                                          | D2 | D2 | D1 | F7                      | 94                     | 4.62 ± 0.09 |
| <b>7G-23</b> | 0                                     | 60  | 10  | 30 | D3                                          | D1 | D1 | D2 | F7                      | 94                     | 3.86 ± 0.10 |
| <b>7G-24</b> | 20                                    | 40  | 40  | 0  | D2                                          | D3 | D4 | D4 | F6                      | 94                     | 4.43 ± 0.03 |
| <b>7G-25</b> | 0                                     | 0   | 100 | 0  | D2                                          | D2 | D1 | D4 | F7                      | 94                     | 4.61 ± 0.07 |
| <b>7G-26</b> | 0                                     | 10  | 80  | 10 | D4                                          | D1 | D3 | D2 | F7                      | 94                     | 5.53 ± 0.07 |
| <b>7G-27</b> | 0                                     | 0   | 90  | 10 | D4                                          | D1 | D2 | D1 | F6                      | 72                     | 5.48 ± 0.03 |
| <b>7G-28</b> | 0                                     | 0   | 90  | 10 | D2                                          | D2 | D2 | D3 | F2                      | 28                     | 4.14 ± 0.04 |
| <b>7G-29</b> | 0                                     | 100 | 0   | 0  | D1                                          | D4 | D4 | D4 | F2                      | 50                     | 4.17 ± 0.14 |
| <b>7G-30</b> | 0                                     | 10  | 80  | 10 | D4                                          | D1 | D2 | D4 | F7                      | 94                     | 5.94 ± 0.06 |

### 7<sup>th</sup> Generation : Cell parameters for 4 independent samples (7G-1 ~ 7G-10)

| 7G-1                           | 1      | 2      | 3      | 4      | average          |
|--------------------------------|--------|--------|--------|--------|------------------|
| $\eta$ (%)                     | 4.84   | 5.00   | 4.99   | 5.15   | $5.00 \pm 0.13$  |
| $J_{sc}$ (mA/cm <sup>2</sup> ) | 9.88   | 10.09  | 9.75   | 10.65  | $10.09 \pm 0.40$ |
| $V_{oc}$ (mV)                  | 687.04 | 679.05 | 704.63 | 701.43 | $693.0 \pm 12.1$ |
| FF(%)                          | 71.32  | 72.89  | 72.68  | 68.94  | $71.5 \pm 1.8$   |

| 7G-2                           | 1      | 2      | 3      | 4      | average         |
|--------------------------------|--------|--------|--------|--------|-----------------|
| $\eta$ (%)                     | 4.93   | 5.00   | 4.99   | 4.95   | $4.97 \pm 0.03$ |
| $J_{sc}$ (mA/cm <sup>2</sup> ) | 9.62   | 10.24  | 9.96   | 9.95   | $9.94 \pm 0.25$ |
| $V_{oc}$ (mV)                  | 692.64 | 693.43 | 690.23 | 688.64 | $691.2 \pm 2.2$ |
| FF(%)                          | 73.99  | 70.42  | 72.56  | 72.28  | $72.3 \pm 1.5$  |

| 7G-3                           | 1      | 2      | 3      | 4      | average         |
|--------------------------------|--------|--------|--------|--------|-----------------|
| $\eta$ (%)                     | 4.47   | 4.35   | 4.30   | 4.27   | $4.35 \pm 0.09$ |
| $J_{sc}$ (mA/cm <sup>2</sup> ) | 8.80   | 8.52   | 8.45   | 8.46   | $8.56 \pm 0.16$ |
| $V_{oc}$ (mV)                  | 690.23 | 691.83 | 692.64 | 691.83 | $691.6 \pm 1.0$ |
| FF(%)                          | 73.66  | 73.80  | 73.38  | 72.87  | $73.4 \pm 0.4$  |

| 7G-4                           | 1      | 2      | 3      | 4      | average          |
|--------------------------------|--------|--------|--------|--------|------------------|
| $\eta$ (%)                     | 4.87   | 4.81   | 4.82   | 4.70   | $4.80 \pm 0.07$  |
| $J_{sc}$ (mA/cm <sup>2</sup> ) | 10.41  | 10.16  | 10.20  | 9.18   | $9.98 \pm 0.55$  |
| $V_{oc}$ (mV)                  | 666.25 | 666.25 | 661.45 | 703.82 | $674.4 \pm 19.7$ |
| FF(%)                          | 70.19  | 71.11  | 71.47  | 72.76  | $71.4 \pm 1.1$   |

| 7G-5                           | 1      | 2      | 3      | 4      | average         |
|--------------------------------|--------|--------|--------|--------|-----------------|
| $\eta$ (%)                     | 4.10   | 4.08   | 3.90   | 4.14   | $4.05 \pm 0.11$ |
| $J_{sc}$ (mA/cm <sup>2</sup> ) | 7.70   | 7.79   | 8.04   | 7.57   | $7.77 \pm 0.20$ |
| $V_{oc}$ (mV)                  | 711.02 | 711.83 | 699.84 | 712.62 | $708.8 \pm 6.0$ |
| FF(%)                          | 74.84  | 73.49  | 69.28  | 76.70  | $73.4 \pm 3.2$  |

| 7G-6                           | 1      | 2      | 3      | 4      | average          |
|--------------------------------|--------|--------|--------|--------|------------------|
| $\eta$ (%)                     | 4.91   | 4.81   | 4.72   | 5.00   | $4.86 \pm 0.12$  |
| $J_{sc}$ (mA/cm <sup>2</sup> ) | 9.66   | 9.09   | 9.62   | 9.13   | $9.37 \pm 0.31$  |
| $V_{oc}$ (mV)                  | 699.03 | 713.43 | 694.24 | 725.42 | $708.0 \pm 14.2$ |
| FF(%)                          | 72.78  | 74.17  | 70.63  | 75.57  | $73.3 \pm 2.1$   |

| 7G-7                           | 1      | 2      | 3      | 4      | average         |
|--------------------------------|--------|--------|--------|--------|-----------------|
| $\eta$ (%)                     | 3.44   | 3.62   | 3.45   | 3.64   | $3.54 \pm 0.11$ |
| $J_{sc}$ (mA/cm <sup>2</sup> ) | 7.23   | 7.37   | 7.13   | 7.65   | $7.34 \pm 0.23$ |
| $V_{oc}$ (mV)                  | 656.66 | 663.86 | 664.65 | 660.65 | $661.5 \pm 3.6$ |
| FF(%)                          | 72.43  | 74.09  | 72.89  | 71.98  | $72.9 \pm 0.9$  |

| 7G-8                           | 1      | 2      | 3      | 4      | average          |
|--------------------------------|--------|--------|--------|--------|------------------|
| $\eta$ (%)                     | 5.40   | 5.22   | 5.39   | 5.40   | $5.35 \pm 0.09$  |
| $J_{sc}$ (mA/cm <sup>2</sup> ) | 11.07  | 10.44  | 10.87  | 11.05  | $10.86 \pm 0.29$ |
| $V_{oc}$ (mV)                  | 696.63 | 695.03 | 703.82 | 686.23 | $695.4 \pm 7.2$  |
| FF(%)                          | 70.04  | 71.94  | 70.51  | 71.17  | $70.9 \pm 0.8$   |

| 7G-9                           | 1      | 2      | 3      | 4      | average         |
|--------------------------------|--------|--------|--------|--------|-----------------|
| $\eta$ (%)                     | 4.21   | 4.04   | 4.16   | 4.05   | $4.12 \pm 0.08$ |
| $J_{sc}$ (mA/cm <sup>2</sup> ) | 8.88   | 8.70   | 8.80   | 8.52   | $8.72 \pm 0.16$ |
| $V_{oc}$ (mV)                  | 660.65 | 658.26 | 658.26 | 655.06 | $658.1 \pm 2.3$ |
| FF(%)                          | 71.74  | 70.56  | 71.88  | 72.54  | $71.7 \pm 0.8$  |

| 7G-10                          | 1      | 2      | 3      | 4      | average         |
|--------------------------------|--------|--------|--------|--------|-----------------|
| $\eta$ (%)                     | 4.17   | 4.05   | 4.10   | 4.27   | $4.15 \pm 0.09$ |
| $J_{sc}$ (mA/cm <sup>2</sup> ) | 7.65   | 7.86   | 7.84   | 7.97   | $7.83 \pm 0.13$ |
| $V_{oc}$ (mV)                  | 697.43 | 684.63 | 697.43 | 701.43 | $695.2 \pm 7.3$ |
| FF(%)                          | 78.16  | 75.22  | 74.99  | 76.29  | $76.2 \pm 1.5$  |



### 7<sup>th</sup> Generation : Cell parameters for 4 independent samples (7G-11 ~ 7G-20)

| 7G-11                           | 1      | 2      | 3      | 4      | average         |
|---------------------------------|--------|--------|--------|--------|-----------------|
| $\eta(\%)$                      | 3.66   | 3.63   | 3.83   | 3.66   | $3.69 \pm 0.09$ |
| $J_{sc}(\text{mA}/\text{cm}^2)$ | 6.44   | 6.35   | 7.10   | 6.40   | $6.57 \pm 0.35$ |
| $V_{oc}(\text{mV})$             | 735.81 | 736.61 | 722.22 | 735.81 | $732.1 \pm 6.9$ |
| FF(%)                           | 77.29  | 77.62  | 74.61  | 77.65  | $76.8 \pm 1.5$  |

| 7G-12                           | 1      | 2      | 3      | 4      | average          |
|---------------------------------|--------|--------|--------|--------|------------------|
| $\eta(\%)$                      | 5.71   | 5.78   | 5.70   | 5.69   | $5.72 \pm 0.04$  |
| $J_{sc}(\text{mA}/\text{cm}^2)$ | 11.22  | 10.35  | 11.23  | 9.99   | $10.70 \pm 0.63$ |
| $V_{oc}(\text{mV})$             | 727.81 | 754.20 | 727.81 | 761.40 | $742.8 \pm 17.6$ |
| FF(%)                           | 69.91  | 74.12  | 69.70  | 74.81  | $72.1 \pm 2.7$   |

| 7G-13                           | 1      | 2      | 3      | 4      | average         |
|---------------------------------|--------|--------|--------|--------|-----------------|
| $\eta(\%)$                      | 4.34   | 4.46   | 4.26   | 4.42   | $4.37 \pm 0.09$ |
| $J_{sc}(\text{mA}/\text{cm}^2)$ | 8.41   | 8.51   | 8.35   | 8.17   | $8.36 \pm 0.14$ |
| $V_{oc}(\text{mV})$             | 727.02 | 742.21 | 730.21 | 741.40 | $735.2 \pm 7.7$ |
| FF(%)                           | 71.03  | 70.61  | 69.89  | 72.97  | $71.1 \pm 1.3$  |

| 7G-14                           | 1      | 2      | 3      | 4      | average          |
|---------------------------------|--------|--------|--------|--------|------------------|
| $\eta(\%)$                      | 4.34   | 4.16   | 4.20   | 4.36   | $4.26 \pm 0.10$  |
| $J_{sc}(\text{mA}/\text{cm}^2)$ | 8.73   | 8.53   | 7.99   | 8.85   | $8.52 \pm 0.38$  |
| $V_{oc}(\text{mV})$             | 679.05 | 678.24 | 706.23 | 679.84 | $685.8 \pm 13.6$ |
| FF(%)                           | 73.26  | 71.96  | 74.33  | 72.35  | $73.0 \pm 1.1$   |

| 7G-15                           | 1      | 2      | 3      | 4      | average          |
|---------------------------------|--------|--------|--------|--------|------------------|
| $\eta(\%)$                      | 5.06   | 5.16   | 5.10   | 5.15   | $5.12 \pm 0.05$  |
| $J_{sc}(\text{mA}/\text{cm}^2)$ | 10.22  | 10.56  | 10.27  | 10.60  | $10.42 \pm 0.19$ |
| $V_{oc}(\text{mV})$             | 682.24 | 680.64 | 687.84 | 679.05 | $682.4 \pm 3.8$  |
| FF(%)                           | 72.58  | 71.82  | 72.20  | 71.55  | $72.0 \pm 0.5$   |

| 7G-16                           | 1      | 2      | 3      | 4      | average          |
|---------------------------------|--------|--------|--------|--------|------------------|
| $\eta(\%)$                      | 5.28   | 5.31   | 5.26   | 5.19   | $5.26 \pm 0.05$  |
| $J_{sc}(\text{mA}/\text{cm}^2)$ | 10.82  | 10.73  | 11.25  | 10.15  | $10.74 \pm 0.45$ |
| $V_{oc}(\text{mV})$             | 699.03 | 706.23 | 687.04 | 706.23 | $699.6 \pm 9.1$  |
| FF(%)                           | 69.75  | 70.02  | 68.11  | 72.37  | $70.1 \pm 1.8$   |

| 7G-17                           | 1      | 2      | 3      | 4      | average          |
|---------------------------------|--------|--------|--------|--------|------------------|
| $\eta(\%)$                      | 5.41   | 5.33   | 5.34   | 5.52   | $5.40 \pm 0.09$  |
| $J_{sc}(\text{mA}/\text{cm}^2)$ | 11.49  | 10.93  | 11.79  | 11.80  | $11.50 \pm 0.41$ |
| $V_{oc}(\text{mV})$             | 695.83 | 703.03 | 692.64 | 697.43 | $697.2 \pm 4.4$  |
| FF(%)                           | 67.65  | 69.41  | 65.37  | 67.07  | $67.4 \pm 1.7$   |

| 7G-18                           | 1      | 2      | 3      | 4      | average         |
|---------------------------------|--------|--------|--------|--------|-----------------|
| $\eta(\%)$                      | 3.94   | 3.92   | 3.98   | 3.89   | $3.93 \pm 0.04$ |
| $J_{sc}(\text{mA}/\text{cm}^2)$ | 8.53   | 8.90   | 8.54   | 8.54   | $8.63 \pm 0.18$ |
| $V_{oc}(\text{mV})$             | 661.45 | 639.86 | 654.25 | 655.85 | $652.9 \pm 9.2$ |
| FF(%)                           | 69.88  | 68.79  | 71.23  | 69.49  | $69.9 \pm 1.0$  |

| 7G-19                           | 1      | 2      | 3      | 4      | average          |
|---------------------------------|--------|--------|--------|--------|------------------|
| $\eta(\%)$                      | 4.95   | 4.84   | 4.77   | 4.80   | $4.84 \pm 0.08$  |
| $J_{sc}(\text{mA}/\text{cm}^2)$ | 10.12  | 10.38  | 10.00  | 10.62  | $10.28 \pm 0.28$ |
| $V_{oc}(\text{mV})$             | 685.44 | 678.24 | 688.64 | 671.85 | $681.0 \pm 7.5$  |
| FF(%)                           | 71.35  | 68.82  | 69.23  | 67.30  | $69.2 \pm 1.7$   |

| 7G-20                           | 1      | 2      | 3      | 4      | average         |
|---------------------------------|--------|--------|--------|--------|-----------------|
| $\eta(\%)$                      | 3.79   | 3.97   | 3.97   | 3.92   | $3.91 \pm 0.09$ |
| $J_{sc}(\text{mA}/\text{cm}^2)$ | 7.15   | 7.27   | 7.29   | 7.30   | $7.25 \pm 0.07$ |
| $V_{oc}(\text{mV})$             | 716.62 | 727.02 | 719.01 | 722.22 | $721.2 \pm 4.5$ |
| FF(%)                           | 73.91  | 75.19  | 75.72  | 74.47  | $74.8 \pm 0.8$  |

### 7<sup>th</sup> Generation : Cell parameters for 4 independent samples (7G-21 ~ 7G-30)

| 7G-21                          | 1      | 2      | 3      | 4      | average     |
|--------------------------------|--------|--------|--------|--------|-------------|
| $\eta$ (%)                     | 3.87   | 4.09   | 4.00   | 4.13   | 4.02 ± 0.11 |
| $J_{sc}$ (mA/cm <sup>2</sup> ) | 7.90   | 8.30   | 8.25   | 8.29   | 8.19 ± 0.19 |
| $V_{oc}$ (mV)                  | 678.24 | 670.25 | 671.04 | 671.85 | 672.9 ± 3.7 |
| FF(%)                          | 72.25  | 73.50  | 72.31  | 74.11  | 73.0 ± 0.9  |

| 7G-22                          | 1      | 2      | 3      | 4      | average     |
|--------------------------------|--------|--------|--------|--------|-------------|
| $\eta$ (%)                     | 4.60   | 4.70   | 4.69   | 4.50   | 4.62 ± 0.09 |
| $J_{sc}$ (mA/cm <sup>2</sup> ) | 9.24   | 9.47   | 9.60   | 9.27   | 9.39 ± 0.2  |
| $V_{oc}$ (mV)                  | 673.45 | 673.45 | 675.85 | 672.64 | 673.9 ± 1.4 |
| FF(%)                          | 73.96  | 73.62  | 72.30  | 72.14  | 73.0 ± 0.9  |

| 7G-23                          | 1      | 2      | 3      | 4      | average     |
|--------------------------------|--------|--------|--------|--------|-------------|
| $\eta$ (%)                     | 3.93   | 3.74   | 3.80   | 3.95   | 3.86 ± 0.10 |
| $J_{sc}$ (mA/cm <sup>2</sup> ) | 7.88   | 7.27   | 7.56   | 7.73   | 7.61 ± 0.26 |
| $V_{oc}$ (mV)                  | 666.25 | 675.04 | 676.64 | 675.04 | 673.2 ± 4.7 |
| FF(%)                          | 74.90  | 76.25  | 74.27  | 75.62  | 75.3 ± 0.9  |

| 7G-24                          | 1      | 2      | 3      | 4      | average     |
|--------------------------------|--------|--------|--------|--------|-------------|
| $\eta$ (%)                     | 4.45   | 4.39   | 4.47   | 4.42   | 4.43 ± 0.03 |
| $J_{sc}$ (mA/cm <sup>2</sup> ) | 9.36   | 8.87   | 9.37   | 9.06   | 9.16 ± 0.24 |
| $V_{oc}$ (mV)                  | 667.05 | 674.24 | 669.44 | 672.64 | 670.8 ± 3.2 |
| FF(%)                          | 71.21  | 73.43  | 71.27  | 72.49  | 72.1 ± 1.1  |

| 7G-25                          | 1      | 2      | 3      | 4      | average     |
|--------------------------------|--------|--------|--------|--------|-------------|
| $\eta$ (%)                     | 4.53   | 4.68   | 4.58   | 4.65   | 4.61 ± 0.07 |
| $J_{sc}$ (mA/cm <sup>2</sup> ) | 9.33   | 10.02  | 9.72   | 9.49   | 9.67 ± 0.30 |
| $V_{oc}$ (mV)                  | 690.23 | 674.24 | 671.85 | 688.64 | 681.2 ± 9.5 |
| FF(%)                          | 70.25  | 69.27  | 70.11  | 71.16  | 70.2 ± 0.8  |

| 7G-26                          | 1      | 2      | 3      | 4      | average      |
|--------------------------------|--------|--------|--------|--------|--------------|
| $\eta$ (%)                     | 5.46   | 5.62   | 5.49   | 5.57   | 5.53 ± 0.07  |
| $J_{sc}$ (mA/cm <sup>2</sup> ) | 11.02  | 11.72  | 10.83  | 11.04  | 11.15 ± 0.39 |
| $V_{oc}$ (mV)                  | 693.43 | 683.84 | 691.04 | 690.23 | 689.6 ± 4.1  |
| FF(%)                          | 71.46  | 70.07  | 73.38  | 73.08  | 72.0 ± 1.5   |

| 7G-27                          | 1      | 2      | 3      | 4      | average      |
|--------------------------------|--------|--------|--------|--------|--------------|
| $\eta$ (%)                     | 5.45   | 5.51   | 5.50   | 5.45   | 5.48 ± 0.03  |
| $J_{sc}$ (mA/cm <sup>2</sup> ) | 10.51  | 10.78  | 11.04  | 10.70  | 10.76 ± 0.22 |
| $V_{oc}$ (mV)                  | 699.84 | 705.42 | 700.63 | 705.42 | 702.8 ± 3.0  |
| FF(%)                          | 74.08  | 72.50  | 71.06  | 72.19  | 72.5 ± 1.2   |

| 7G-28                          | 1      | 2      | 3      | 4      | average     |
|--------------------------------|--------|--------|--------|--------|-------------|
| $\eta$ (%)                     | 4.12   | 4.11   | 4.19   | 4.14   | 4.14 ± 0.04 |
| $J_{sc}$ (mA/cm <sup>2</sup> ) | 7.22   | 7.44   | 7.55   | 7.42   | 7.41 ± 0.14 |
| $V_{oc}$ (mV)                  | 739.01 | 743.81 | 739.80 | 739.80 | 740.6 ± 2.2 |
| FF(%)                          | 77.23  | 74.30  | 75.03  | 75.43  | 75.5 ± 1.3  |

| 7G-29                          | 1      | 2      | 3      | 4      | average     |
|--------------------------------|--------|--------|--------|--------|-------------|
| $\eta$ (%)                     | 4.25   | 3.97   | 4.26   | 4.21   | 4.17 ± 0.14 |
| $J_{sc}$ (mA/cm <sup>2</sup> ) | 7.79   | 7.02   | 7.78   | 7.76   | 7.59 ± 0.38 |
| $V_{oc}$ (mV)                  | 714.22 | 719.82 | 713.43 | 717.42 | 716.2 ± 3.0 |
| FF(%)                          | 76.39  | 78.55  | 76.79  | 75.58  | 76.8 ± 1.3  |

| 7G-30                          | 1      | 2      | 3      | 4      | average      |
|--------------------------------|--------|--------|--------|--------|--------------|
| $\eta$ (%)                     | 6.02   | 5.89   | 5.89   | 5.95   | 5.94 ± 0.06  |
| $J_{sc}$ (mA/cm <sup>2</sup> ) | 11.95  | 11.83  | 11.46  | 11.33  | 11.64 ± 0.29 |
| $V_{oc}$ (mV)                  | 697.45 | 694.24 | 696.63 | 698.24 | 696.6 ± 1.7  |
| FF(%)                          | 72.17  | 71.72  | 73.74  | 73.93  | 72.9 ± 1.1   |
